# Supplementary material for: Type I photosensitizers based on phosphindole oxide for photodynamic therapy: apoptosis and autophagy induced by endoplasmic reticulum stress
Source: PubMed Central journal article supplement — Chem Sci. 2020 Mar 2;11(13):3405–17. doi: 10.1039/d0sc00785d (PMC8515424; doi:10.1039/d0sc00785d), 2020-03-02
Supplement: SC-011-D0SC00785D-s001.pdf [file SC-011-D0SC00785D-s001.pdf]

*Electronic Supplementary Information (ESI)*

**Type I photosensitizers based on phosphindole oxide for  
photodynamic therapy: apoptosis and autophagy induced by  
endoplasmic reticulum stress**

Zeyan Zhuang,<sup>a</sup> Jun Dai,<sup>b</sup> Maoxing Yu,<sup>a</sup> Jianqing Li,<sup>a</sup> Pingchuan Shen,<sup>a</sup> Rong Hu,<sup>a</sup> Xiaoding Lou,<sup>c</sup>  
Zujin Zhao\*<sup>a</sup> and Ben Zhong Tang<sup>a,d</sup>

<sup>a</sup> State Key Laboratory of Luminescent Materials and Devices, Guangdong Provincial Key Laboratory of Luminescence from Molecular Aggregates, South China University of Technology, Guangzhou 510640, China.

<sup>b</sup> Department of Obstetrics and Gynecology, Tongji Hospital, Tongji Medical College, Huazhong University of Science and Technology, Wuhan 430074, China.

<sup>c</sup> Engineering Research Center of Nano-Geomaterials of Ministry of Education, Faculty of Materials Science and Chemistry, China University of Geosciences, Wuhan 430074, China.

<sup>d</sup> Department of Chemistry, The Hong Kong University of Science & Technology, Clear Water Bay, Kowloon, Hong Kong, China.

\*Correspondence: mszjzhao@scut.edu.cn

# Contents

## **1. General information**

### **1.1 Materials**

### **1.2 Instruments**

## **2. Methods and Experimental Procedures**

### **2.1 Cyclic voltammetry measurement**

### **2.2 ROS generation measurement in aqueous media**

#### *2.2.1 General ROS detection by fluorescence analysis*

#### *2.2.2 OH<sup>•</sup> detection by fluorescence analysis*

#### *2.2.3 Type I ROS detection by EPR analysis*

#### *2.2.4 <sup>1</sup>O<sub>2</sub> detection by fluorescence analysis*

### **2.3 Cellular study**

#### *2.3.1 Cell cultures*

#### *2.3.2 Biocompatibility measurement*

#### *2.3.3 Cell imaging*

#### *2.3.4 Confocal co-localization*

### **2.4 ROS generation measurement in vitro**

#### *2.4.1 General ROS detection*

#### *2.4.2 O<sub>2</sub><sup>•-</sup> detection*

#### *2.4.3 OH<sup>•</sup> detection*

### **2.5 PDT in vitro**

#### *2.5.1 In vitro PDT evaluation*

#### *2.5.2 Live/dead cell co-staining assay*

#### *2.5.3 Western blot analysis*

#### *2.5.4 Cell apoptosis analysis*

#### *2.5.5 Immunofluorescence images of LC3B*

### **2.6 β-TPA-PIO mediated PDT in vivo**

#### *2.6.1 Subcutaneous tumor model*

#### *2.6.2 In vivo imaging*

#### *2.6.3 In vivo PDT evaluation*

#### *2.6.4 Histological analysis*

#### *2.6.5 TUNEL assay*

#### *2.6.6 Immunohistochemical (IHC) Staining*

## **3. Supplementary Figures and Tables**

## **4. Reference**

## ***1. General information and methods***

### ***1.1 Materials***

Tetrahydrofuran (THF) was distilled from sodium benzophenone ketyl under dry nitrogen immediately prior to use. Ultrapure water was supplied by Milli-Q Plus System (Millipore Corporation, United States). Compound **3** was prepared according to the reported literature.<sup>1</sup> Phosphate buffered saline (PBS), fetal bovine serum (FBS), penicillin, streptomycin, were purchased from Thermo Fisher Scientific. Dulbecco's Modified Essential Medium (DMEM) was purchased from Gibco (Life Technologies). 3-(4,5-Dimethyl-2-thiazolyl)-2,5-diphenyl-2H-tetrazolium bromide (MTT) was purchased from J&K Scientific Ltd. The HeLa cell lines were purchased from the Cell Resource Center, Peking Union Medical College. The SKOV-3 cell lines were purchased from Boshide Biological Technology Co., Ltd. The female BALB/c nude mice (5-week-old) were purchased from Beijing Vital River Laboratory Animal Technology Co., Ltd. Other chemicals and reagents were purchased from commercial sources and used as received without further purification.

### ***1.2 Instruments***

<sup>1</sup>H and <sup>13</sup>C NMR spectra were measured on a Bruker AV 500 spectrometer in deuterated dichloromethane using tetramethylsilane (TMS;  $\delta = 0$ ) as internal reference at room temperature. High resolution mass spectra (HRMS) were recorded on a GCT premier CAB048 mass spectrometer operating in a MALDT-TOF mode. UV-vis absorption spectra were measured on a SHIMADZU UV-2600 spectrophotometer. Photoluminescence spectra were recorded on a Horiba Fluoromax-4 fluorescence spectrophotometer. Fluorescence quantum yields were measured using a Hamamatsu absolute PL quantum yield spectrometer C11347 Quantaaurus\_QY. Particle size analysis was performed on a Malvern Zetasizer Nano-S90. Cyclic voltammetry was measured on a CHI 630E electrochemical analyzer. The Electron paramagnetic resonance (EPR) measurements were carried out on Bruker ELEXSYS-II E500 in X-band. Confocal laser scanning microscopy (CLSM) images were obtained on a Zeiss LSM7 DUO Laser Scanning Confocal Microscope. Automated cell counter (Countess II) was employed for cell counting. The cell viability analysis for estimating cytotoxicity was collected using a microplate reader (Tecan Infinite M200PRO) at a wavelength of 570 nm. The white light source was a CXE-350 xenon lamp fiber illumination system produced by Photoelectronic Instrument Factory of Beijing Normal University. The irradiation light energy

density was measured using an FZ-A irradiator produced by Photoelectronic Instrument Factory of Beijing Normal University. Bio-rad Mini-PROTEAN® system was employed for electrophoresis and membrane transfer. The *in vitro* hypoxic condition<sup>2</sup> was created using microaerophilic AnaeroPack produced by Mitsubishi Gas Chemical Company, Inc. Western blotting documentation was performed on an X-ray camera cassette produced by Yijia Biotechnology, using Fuji X-ray film. Imaging of mouse was performed by using IVIS Spectrum imaging system from Perkin Elmer. The ground-state and excited-state geometries in THF were optimized using the density function theory (DFT) and time-dependent density function theory (TD-DFT) method, respectively, with M06-2X hybrid functional at the basis set level of 6-311G (d,p) under the solvent model of Solvation Model Based on Density (SMD), performed using Gaussian 09 package, Revision D.01.<sup>3</sup> No symmetry constraint was applied for optimization. The electron and hole analysis and atomic dipole moment corrected Hirshfeld (ADCH) analysis were performed with Multiwfn 3.6. The spin-orbit coupling (SOC) values were calculated by using Dalton, Release v2016.2.<sup>4</sup>

## ***2. Methods and Experimental Procedure***

### ***2.1 Cyclic voltammetry measurement***

The cyclic voltammetry measurement was conducted in dichloromethane (for positive scan) or *N,N*-dimethylformamide (DMF, for negative scan) with 0.1 M tetrabutylammonium hexafluorophosphate as the supporting electrolyte at a scan rate of 100 mV s<sup>-1</sup> using platinum as the working electrode, saturated calomel electrode (SCE) as the reference electrode and platinum wire counter electrode. The SCE reference electrode was calibrated using the ferrocene/ferrocenium (Fc/Fc<sup>+</sup>) redox couple as an external standard.

### ***2.2 ROS generation measurement in aqueous media***

#### ***2.2.1 General ROS detection by fluorescence analysis***

The general ROS generation measurements were conducted using 2,7-dichlorodihydrofluorescein (DCFH) as the indicator, which was converted from 2,7-dichlorodihydrofluorescein diacetate (DCFH-DA, 0.5 mL, 1 mM in ethanol) reacting with aqueous solution of NaOH (2 mL, 1.0 mM) for 30 min at room temperature. The hydrolysate was then neutralized with 7.5 mL PBS buffer solution to get the stock solution with a concentration of 50 μM. PBS buffer solution containing 1 μM DCFH was added 1 μM α-TPA-PIO (stock solution: 0.1 mM in dimethylsulfoxide (DMSO)), β-TPA-PIO

(stock solution: 0.1 mM in DMSO), crystal violet (CV, stock solution: 0.1 mM in water with additional DMSO), methylene blue (MB, stock solution: 0.1 mM in water with additional DMSO), or pure DMSO. Additional 500 nM/5  $\mu$ M bovine serum albumin (BSA, stock solution: 0.1 mM in water) was added in the substrate-containing group. The fluorescence signal of indicator was monitored in a range of 510–560 nm with the excitation wavelength at 504 nm after the solution was irradiated by white light irradiation of 20 mW cm<sup>-2</sup>. The fluorescence intensity change at 522 nm was recorded to indicate the ROS generation rate.

#### 2.2.2 OH• detection by fluorescence analysis

The OH• generation measurements were conducted using hydroxyphenyl fluorescein (HPF) as the indicator. PBS buffer solution containing 5  $\mu$ M HPF (stock solution: 5 mM in DMF) was added 1  $\mu$ M  $\alpha$ -TPA-PIO (stock solution: 0.1 mM in DMSO),  $\beta$ -TPA-PIO (stock solution: 0.1 mM in DMSO), CV (stock solution: 0.1 mM in water with additional DMSO), or pure DMSO. Additional 500 nM/5  $\mu$ M BSA (stock solution: 0.1 mM in water) was added in the substrate-containing group. The fluorescence signal of indicator was monitored in a range of 500–550 nm with the excitation wavelength at 480 nm after the solution was irradiated by white light irradiation of 20 mW cm<sup>-2</sup>. The fluorescence intensity at 514 nm was recorded to indicate the OH• generation rate.

#### 2.2.3 Type I ROS detection by EPR analysis

EPR analysis was performed to monitor the generation of Type I ROS using 5-tert-butoxycarbonyl-5-methyl-1-pyrroline-*N*-oxide (BMPO) as spin-trap agent. PBS buffer solution containing 20 mM BMPO was added 10  $\mu$ M  $\alpha$ -TPA-PIO (stock solution: 1 mM in DMSO),  $\beta$ -TPA-PIO (stock solution: 1 mM in DMSO), CV (stock solution: 1 mM in water with additional DMSO), or pure DMSO. Additional 5  $\mu$ M BSA (stock solution: 1 mM in water) was added in the substrate-containing group. Spectra of spin was monitored in a range of 3350–3650 G after the solution was irradiated by irradiation white light of 100 mW cm<sup>-2</sup> for 5 min. Background interference was corrected using the sample before irradiation.

#### 2.2.4 <sup>1</sup>O<sub>2</sub> detection by fluorescence analysis

The <sup>1</sup>O<sub>2</sub> generation measurements were conducted using Singlet Oxygen Sensor Green (SOSG) and 9,10-anthracenediyl-bis(methylene) dimalonic acid (ABDA) as the indicator.

PBS buffer solution containing 5  $\mu$ M SOSG (stock solution: 5 mM in DMSO) was added 1  $\mu$ M  $\alpha$ -TPA-PIO (stock solution: 0.1 mM in DMSO),  $\beta$ -TPA-PIO (stock solution: 0.1 mM in DMSO), MB

(stock solution: 0.1 mM in water with additional DMSO), or pure DMSO. The fluorescence signal of indicator was monitored in a range of 510–560 nm with the excitation wavelength at 480 nm after the solution was irradiated by white light irradiation of 20 mW cm<sup>-2</sup>. The fluorescence intensity at 527 nm was recorded to indicate the <sup>1</sup>O<sub>2</sub> generation rate.

PBS buffer solution containing 10 μM ABDA (stock solution: 10 mM in DMSO) was added 1 μM α-TPA-PIO (stock solution: 0.1 mM in DMSO), β-TPA-PIO (stock solution: 0.1 mM in DMSO), MB (stock solution: 0.1 mM in water with additional DMSO), or pure DMSO. The absorption spectra of indicator were monitored in a range of 330–450 nm with the excitation wavelength at 480 nm after the solution was irradiated by white light irradiation of 20 mW cm<sup>-2</sup>. The absorbance decline relative to the initial value at 380 nm was recorded to indicate the decomposition rates of ABDA (<sup>1</sup>O<sub>2</sub> generation rate).

## **2.3 Cellular study**

### *2.3.1 Cell cultures*

HeLa cells were cultured in DMEM medium containing 10% FBS and antibiotics (100 units/mL penicillin and 100 μg/mL streptomycin) in a humidified incubator with 5% CO<sub>2</sub> at 37 °C.

### *2.3.2 Biocompatibility measurement*

Hela cells were seeded in 96-well plates at a density of 1 × 10<sup>5</sup> cells/mL. After 24 h of culture, different concentrations of α-TPA-PIO or β-TPA-PIO were added and incubated at 37 °C for 24/36/48 h in dark. The sample and control wells were washed twice with PBS buffer and added with freshly prepared 100 μL MTT solution (0.5 mg/mL). After incubation at 37 °C for 4 h, the MTT solution was removed and washed twice with PBS buffer. 100 μL DMSO was then added into each well and the plate was gently shaken for 3 min at room temperature to dissolve all the precipitates formed. The absorbance of sample and control wells at 570 nm was then measured by a microplate Reader. Cell viability was then calculated by the ratio of the absorbance of sample wells to control cells.

### *2.3.3 Cell imaging*

HeLa cells were grown in a confocal imaging dish at 37 °C. After incubation with medium containing 1 μM α-TPA-PIO or β-TPA-PIO (stock solution: 1 mM in DMSO) for 30 min, the cells were imaged by CLSM in the channel mode as well as lambda mode at excitation of 405 nm without further washed. The emission filter was 415–725 nm.

### 2.3.4 Confocal co-localization

HeLa cells were grown in a confocal imaging dish at 37 °C. HeLa cells were first incubated with 1 mL medium containing commercial dyes ER-Tracker Red (1 μM, stock solution: 1 mM in DMSO), Mito-Tracker Red (100 nM, stock solution: 100 μM in DMSO), Lyso-Tracker Red (100 nM, stock solution: 100 μM in DMSO) or HCS LipidTOX™ Deep Red neutral lipid stain (Art. No.: Invitrogen H34477, 1/1000 dilution),<sup>5</sup> at 37 °C for 30 min. The medium was then removed. After rinsed with PBS for three times and then stained with medium containing 1 μM  $\alpha$ -TPA-PIO or  $\beta$ -TPA-PIO (stock solution: 1 mM in DMSO) for 30 min, the cells were imaged using CLSM. For  $\alpha$ -TPA-PIO and  $\beta$ -TPA-PIO, the excitation was 405 nm and the emission filter was 420–580 nm; For ER-Tracker Red, Mito-Tracker Red and Lyso-Tracker Red, the excitation was 488 nm, and the emission filter was 590–720 nm; For HCS LipidTOX™ Deep Red neutral lipid stain, the excitation was 633 nm, and the emission filter was 640–740 nm.

## 2.4 ROS generation measurement *in vitro*

### 2.4.1 General ROS detection

HeLa cells were grown in a confocal imaging dish at 37 °C. After incubation with medium containing 10 μM  $\alpha$ -TPA-PIO,  $\beta$ -TPA-PIO (stock solution: 1 mM in DMSO) or pure DMSO for 30 min and treatment with medium containing 10 μM DCFH-DA (stock solution: 1 mM in ethanol) for 30 min at 37 °C, the cells were imaged by CLSM at excitation of 488 nm with continuous irradiation of 405 nm laser of 1% power in the designated area. The signal intensity was recorded at every 10 s and measured using ZEN 2012 (blue edition) software. The emission filter was 495–550 nm.

### 2.4.2 $O_2^{\bullet-}$ detection

HeLa cells were grown in a confocal imaging dish at 37 °C. After incubation with medium containing 10 μM  $\alpha$ -TPA-PIO,  $\beta$ -TPA-PIO (stock solution: 1 mM in DMSO) or pure DMSO for 30 min and treatment with medium containing 5 μM DHE (stock solution: 1 mM in DMSO) for 30 min at 37 °C, the cells were imaged by CLSM at excitation of 488 nm with continuous irradiation of 405 nm laser of 1% power in the designated area. The signal intensity was recorded at every 10 s and measured using ZEN 2012 (blue edition) software. The emission filter was 580–650 nm.

### 2.4.3 $OH^{\bullet}$ detection

HeLa cells were grown in a confocal imaging dish at 37 °C. After incubation with medium containing 10 μM  $\alpha$ -TPA-PIO,  $\beta$ -TPA-PIO (stock solution: 1 mM in DMSO) or pure DMSO for 30

min and treatment with medium containing 5  $\mu$ M HPF (stock solution: 1 mM in DMF) for 30 min at 37 °C, the cells were imaged by CLSM at excitation of 488 nm with continuous irradiation of 405 nm laser of 1% power in the designated area. The signal intensity was recorded at every 10 s and measured using ZEN 2012 (blue edition) software. The emission filter was 495–550 nm.

## **2.5 PDT *in vitro***

### *2.5.1 In vitro PDT evaluation*

HeLa cells were seeded in 96-well plates at a density of  $1 \times 10^5$  cells/mL. After 24 h of culture, different concentrations of  $\alpha$ -TPA-PIO or  $\beta$ -TPA-PIO were added and incubated at 37 °C for 30 min in dark. Without or with the exposure to white light irradiation of 20 mW cm<sup>-2</sup> for different time, the cells were further incubated at 37 °C to 24 h. MTT assay was conducted as described in 2.3.2.

### *2.5.2 Live/dead cell co-staining assay*

HeLa cells were grown in a confocal imaging dish at 37 °C in normal condition or in hypoxic condition. After incubation with medium containing 10  $\mu$ M  $\alpha$ -TPA-PIO,  $\beta$ -TPA-PIO (stock solution: 1 mM in DMSO) or pure DMSO for 30 min in normal condition or in hypoxic condition. With the exposure to white light irradiation of 20 mW cm<sup>-2</sup> for 30 min, the cells were further incubated at 37 °C to 24 h in normal condition or in hypoxic condition. Then after stained with medium containing 2  $\mu$ M calcein-AM (stock solution: 1 mM in DMSO) and 2  $\mu$ g/mL PI (stock solution: 1 mg/mL in DMSO) for 10 min, the cells were imaged using CLSM. For calcein-AM, the excitation was 488 nm, and the emission filter was 490–540 nm; For PI, the excitation was 543 nm, and the emission filter was 590–680 nm.

### *2.5.3 Western blot analysis*

Protein levels in HeLa cells received various treatments were analyzed by Western blot. The cells were lysed using Sodium dodecyl sulfate (SDS) Lysis Buffer containing protease and phosphatase inhibitor. Equal amounts of proteins quantified by BCA Protein Assay Kit were electrophoresed on 12% polyacrylamide gels and transferred to a polyvinylidene fluoride membrane. After blocking with 5% skim milk for 1 h, primary antibody, namely anti-GRP78 (Abcam), anti-CHOP (Affinity), anti-Bcl-2 (Abcam), anti-cleaved caspase-3 (Abcam), anti-LC3B (Abcam) or anti-GAPDH (Yijia Biotechnology), was bound for 1 h. After washing with PBS-Tween, the membrane was incubated with secondary antibody (Yijia Biotechnology) for 1 h at room temperature. Detection was carried out with electrochemiluminescent (ECL) HRP substrate, documented with X-ray film for



visualization. The grayscale image of each labeled protein band was analyzed using ImageJ software.

#### 2.5.4 Cell apoptosis analysis

HeLa cells were grown in a confocal imaging dish at 37 °C. After incubation with medium containing 10  $\mu$ M  $\beta$ -TPA-PIO (stock solution: 1 mM in DMSO) for 30 min for 30 min. With the exposure to white light irradiation of 20 mW cm<sup>-2</sup> for 30 min, the cells were further incubated at 37 °C to 12 h. The positive control group was treated with medium containing 880  $\mu$ M H<sub>2</sub>O<sub>2</sub> (stock solution: 3% aqueous solution) for 6 h. Then after stained with medium containing annexin V-Alexa Fluor™ 488 conjugate (1/200 dilution) as secondary antibody and 2  $\mu$ g/mL PI (stock solution: 1 mg/mL in DMSO) for 30 min, the cells were imaged using CLSM. For annexin V-Alexa Fluor™ 488 conjugate, the excitation was 488 nm, and the emission filter was 490–550 nm; For PI, the excitation was 543 nm, and the emission filter was 615–680 nm.

#### 2.5.5 Immunofluorescence images of LC3B

HeLa cells were grown in a confocal imaging dish at 37 °C. After incubation with medium containing 10  $\mu$ M  $\beta$ -TPA-PIO (stock solution: 1 mM in DMSO) or pure DMSO for 30 min. With the exposure to white light irradiation of 20 mW cm<sup>-2</sup> for 30 min, the cells were further incubated at 37 °C for another 2 h. Then the cells were fixed with 4% paraformaldehyde for 15 min at room temperature, permeabilized with 0.2% Triton X-100 for 15 minutes at room temperature and then blocked with 5% skim milk in 0.2% PBS-T for 1 h. The cells were then incubated overnight at 4 °C with anti-LC3B antibody (Abcam) followed by a further incubation at room temperature for 2 h with an Alexa Fluor® 488 secondary (Beyotime). The cells were then imaged using CLSM. The excitation was 488 nm, and the emission filter was 490–550 nm.

### 2.6 $\beta$ -TPA-PIO mediated PDT *in vivo*

#### 2.6.1 Subcutaneous tumor model

All mice were kept in SPF-level feeding rooms with adequate water and food. The temperature of the feeding room is kept at 26 °C, the humidity is 50% and a 12-hour light/dark cycle. The 5-week-old nude mice were inoculated subcutaneously with SKOV-3 cells ( $1 \times 10^6$  cells) into the right front flanks to establish the liver tumor model. Tumor growth was measured using a caliper, and tumor volume was calculated using the formula: tumor volume = width  $\times$  width  $\times$  length/2. When tumors reached an average volume of 50 mm<sup>3</sup>, mice were used for *in vivo* imaging and PDT evaluation.

#### 2.6.2 *In vivo* imaging

$\beta$ -TPA-PIO (1 mM, 25  $\mu$ L/50 mm<sup>3</sup> tumor) was injected into the tumors *in situ*. After 24 hours, *in vivo* fluorescence imaging was visualized on IVIS Spectrum imaging system. The excitation was 430 nm, and the collected emission was 580 nm.

### 2.6.3 *In vivo* PDT evaluation

All mice were randomly divided into three groups (n = 5): PBS (light +),  $\beta$ -TPA-PIO (light -) and  $\beta$ -TPA-PIO (light +) groups.  $\beta$ -TPA-PIO (1 mM, 25  $\mu$ L/50 mm<sup>3</sup> tumor) was injected into the tumors *in situ*. After 24 hours, mice in PBS (light +) and  $\beta$ -TPA-PIO (light +) groups were irradiated with white light of 200 mW cm<sup>-2</sup> for 15 minutes, while  $\beta$ -TPA-PIO (light -) group was not administered. Body weight and tumor volumes were measured once in 3 days. The mice after 25 days post-PDT were sacrificed and the tumor and the major organs (liver, spleen, kidney, heart and lung) were harvested. The collected tissues were fixed in formalin, which were then processed into paraffin, sliced at thickness of 4  $\mu$ m for further analysis.

### 2.6.4 Histological analysis

The slices were stained with hematoxylin and eosin (H&E) and imaged by optical microscopy, according to the manufacturer's instructions.

### 2.6.5 Terminal deoxynucleotidyl transferase dUTP nickend labeling (TUNEL) assay

Apoptosis in tumor tissues was evaluated by TUNEL assay using a TUNEL Assay Kit. 50  $\mu$ L of 0.1% Triton X-100 was added on to slides and incubated at room temperature for 10 min. TUNEL (DAPI) substrate was added for nuclear staining. The slides were washed with PBS three times and observed under fluorescence microscope. TUNEL positive signal was collected under excitation of 488 nm in green channel; DAPI signal was collected under excitation of 365 nm in blue channel.

### 2.6.6 Immunohistochemical (IHC) Staining

The slices were dewaxed in xylene and dehydrated with gradient ethanol. A nonspecific stain blocking agent was added to slides, which were then incubated for 30 min at room temperature. The primary antibody, namely anti-GRP78 (Abcam), anti-CHOP (Affinity), anti-Bcl-2 (Beyotime), anti-cleaved caspase-3 (Cell Signaling Technology), anti-LC3B (Abcam) or anti-Ki-67 (Abcam), was added and slides incubated overnight at 4°C. After washing in PBS three times, the slides were incubated with secondary antibody (Zsbio) for 30 min at room temperature. The complex was visualized with 3,3'-diaminobenzidine complex, and the nuclei were counterstained with haematoxylin. The slices with brown or yellow cytoplasm were considered to be positive.



### 3. Supplementary Figures and Tables

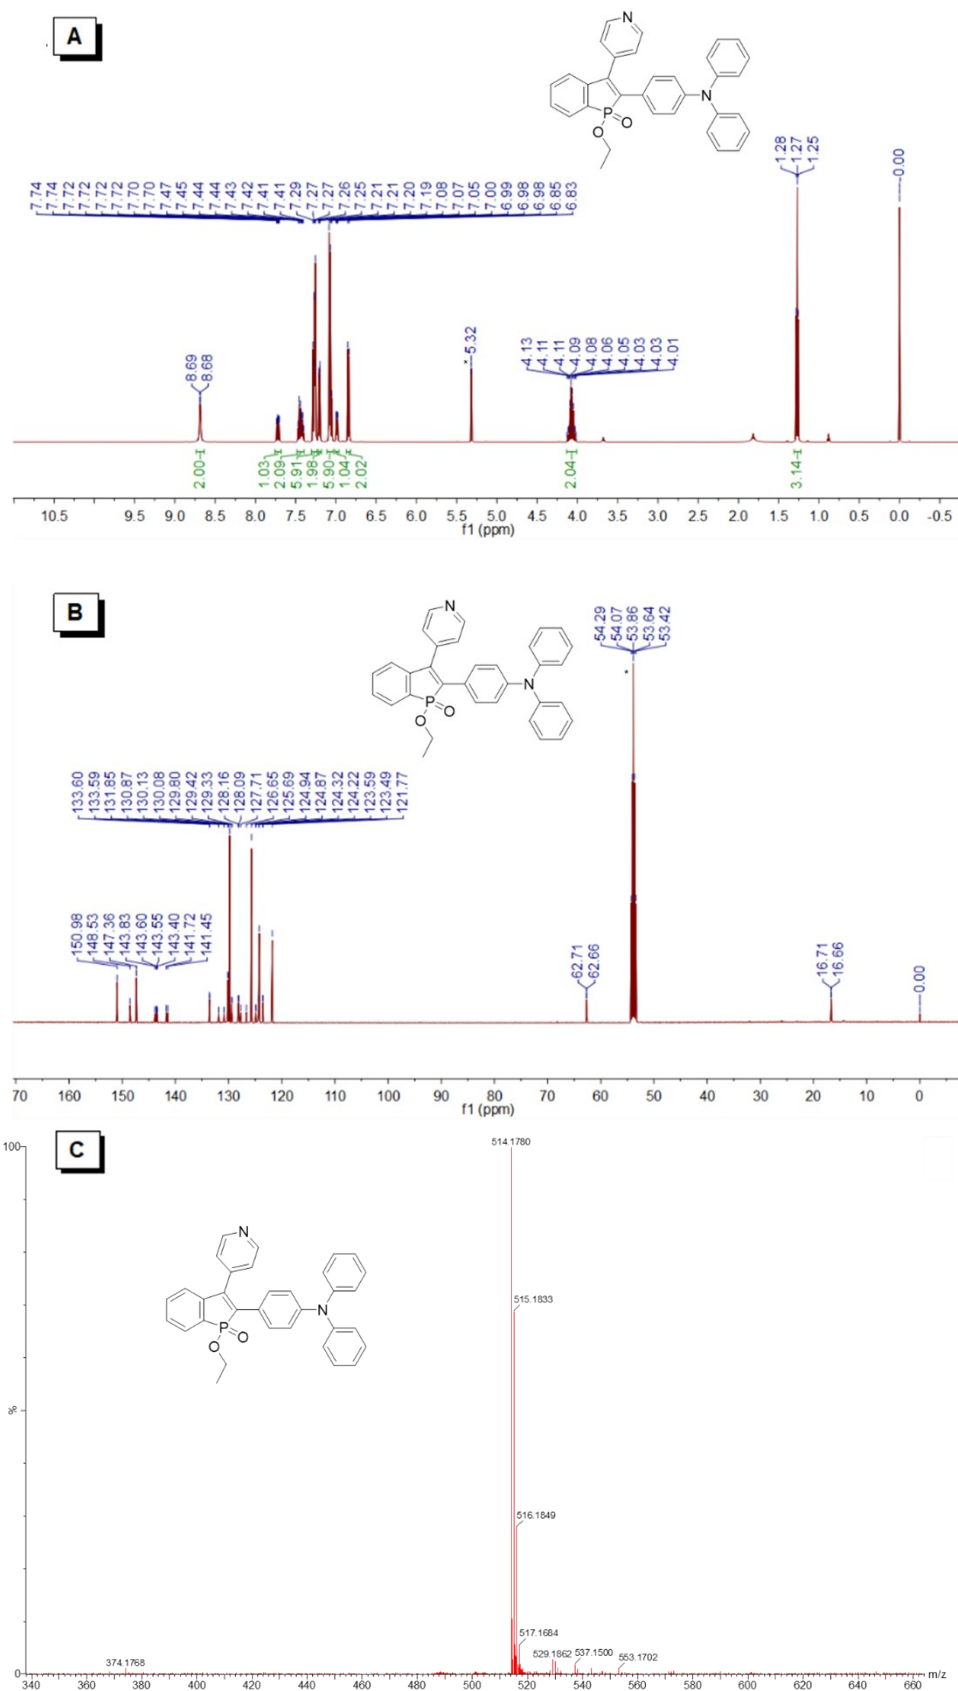

**Figure S1.** (A)  $^1\text{H}$  NMR, (B)  $^{13}\text{C}$  NMR and (C) HRMS spectra of  $\alpha$ -TPA-PIO.

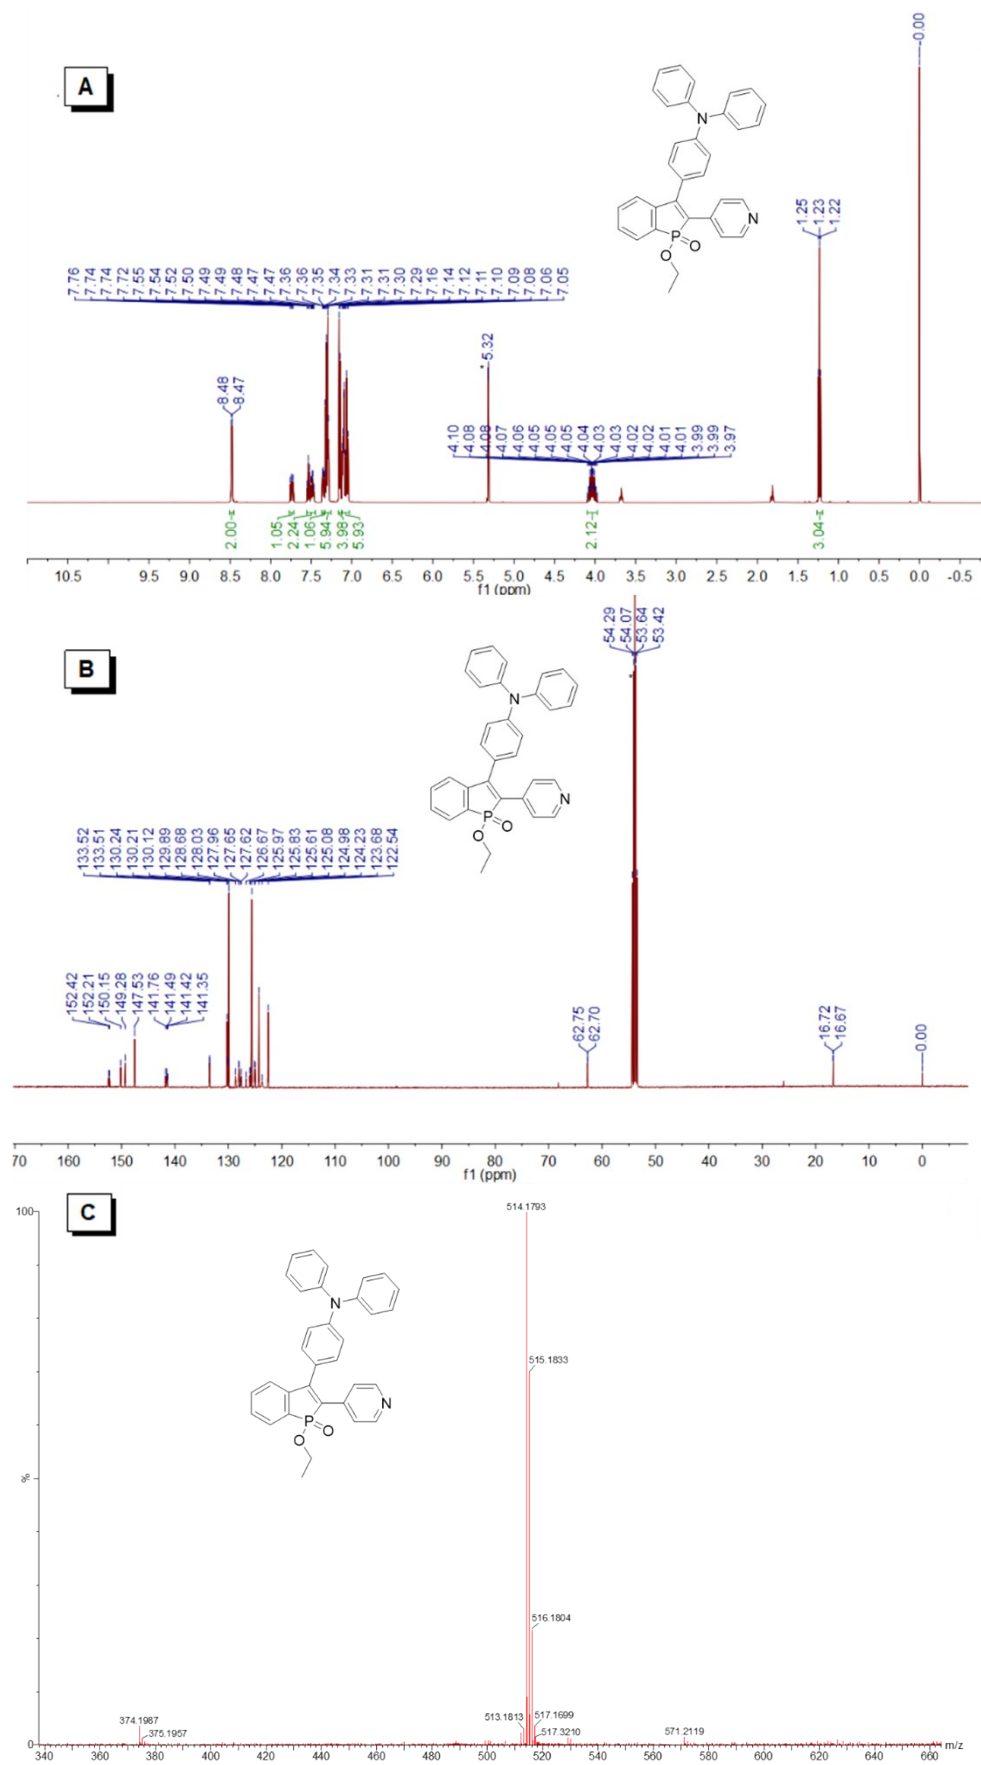

**Figure S2.** (A)  $^1\text{H}$  NMR, (B)  $^{13}\text{C}$  NMR and (C) HRMS spectra of  $\beta$ -TPA-PIO.

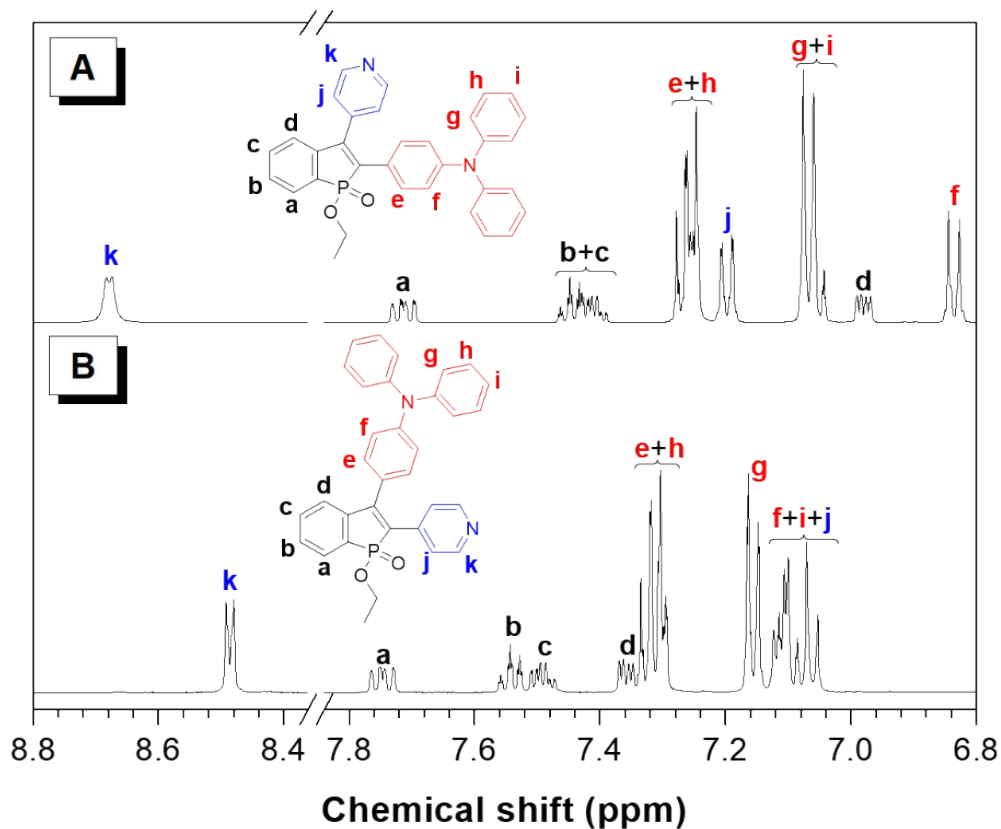

**Figure S3.**  $^1\text{H}$  NMR spectra of (A)  $\alpha$ -TPA-PIO and (B)  $\beta$ -TPA-PIO in  $\text{CD}_2\text{Cl}_2$ .

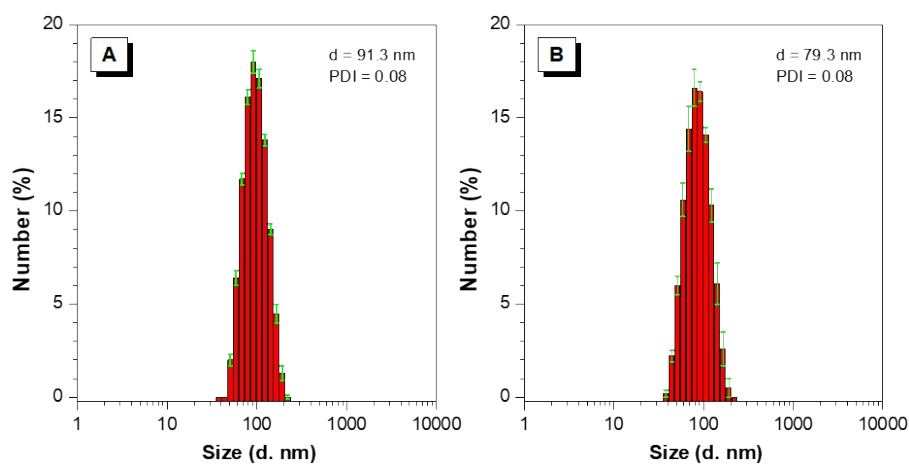

**Figure S4.** Particle size distribution of (A)  $\alpha$ -TPA-PIO and (B)  $\beta$ -TPA-PIO with average diameter (d) and polydispersity indexes (PDI) measured by dynamic light scattering.

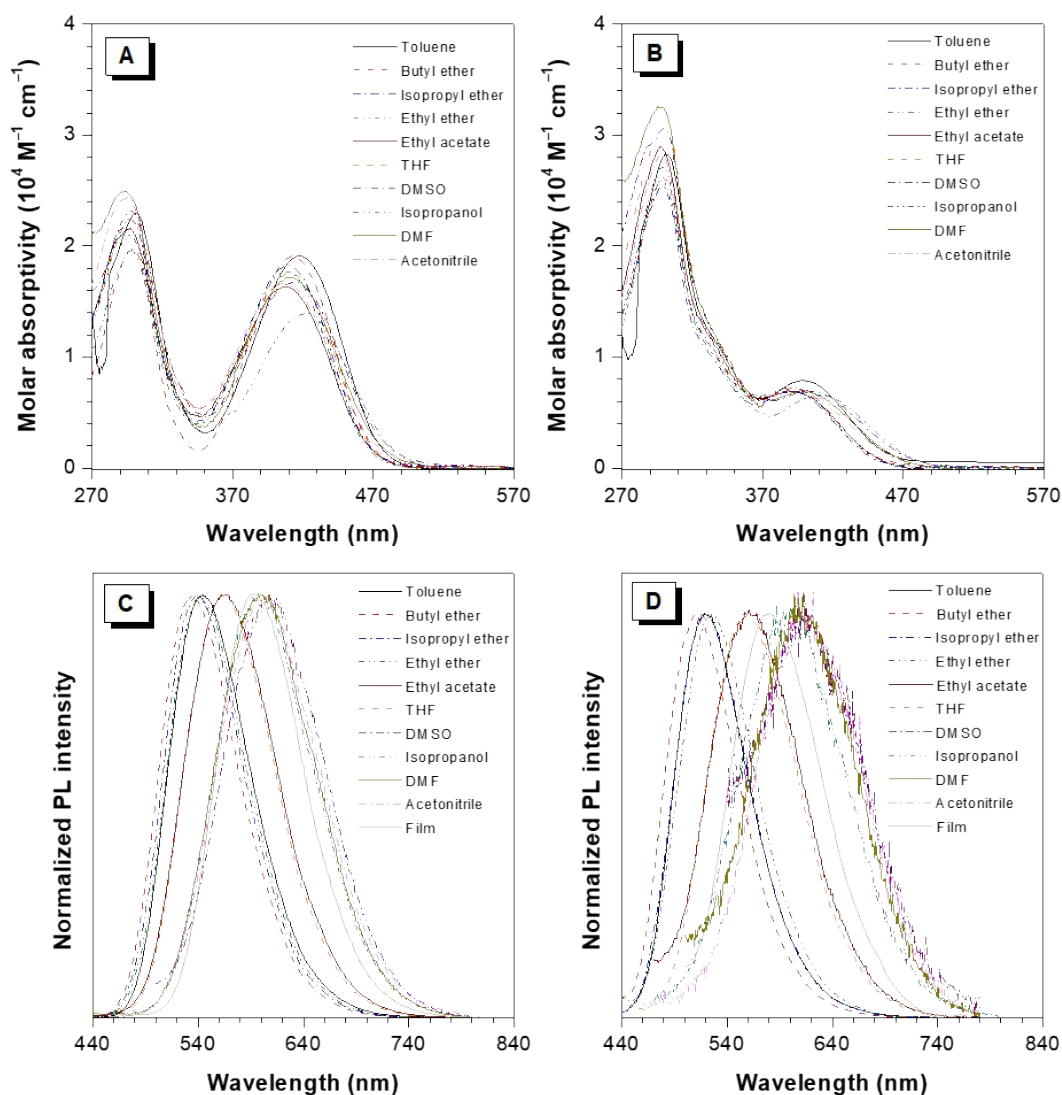

**Figure S5.** Absorption spectra of (A)  $\alpha$ -TPA-PIO and (B)  $\beta$ -TPA-PIO in various solvents with different polarities (concentration: 10  $\mu$ M). Normalized PL spectra of (C)  $\alpha$ -TPA-PIO and (D)  $\beta$ -TPA-PIO in various solvents with different polarities (concentration: 10  $\mu$ M) and in films, excited at the maximum absorption wavelength.

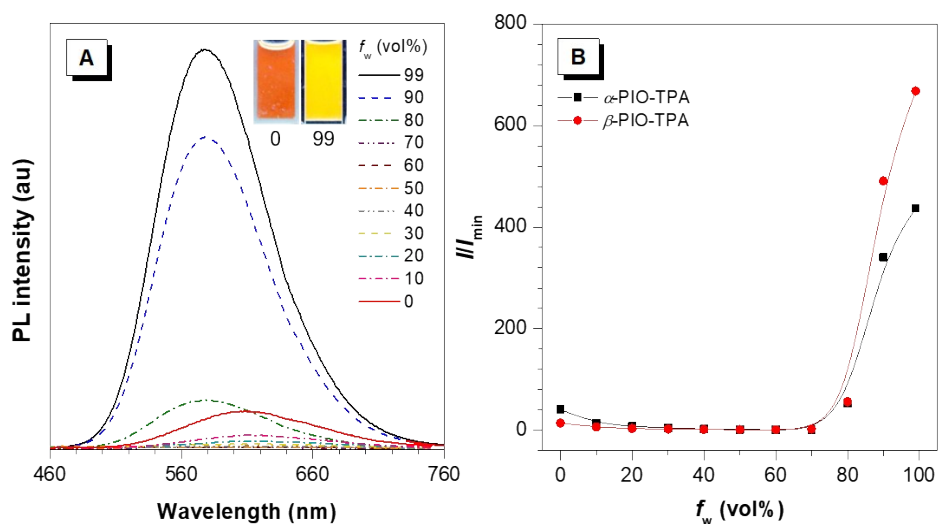

**Figure S6.** (A) PL spectra of  $\alpha$ -TPA-PIO in DMSO/water mixtures with different water fractions ( $f_w$ s), excited at 415 nm. Inset: Photos of solutions of  $\alpha$ -TPA-PIO in DMSO/water mixtures ( $f_w = 0$  and 99 vol%), taken under the illumination of a UV lamp (365 nm). (B) Plots of  $I/I_{\min}$  vs.  $f_w$  for  $\alpha$ -TPA-PIO and  $\beta$ -TPA-PIO in DMSO/water mixtures with different  $f_w$ s;  $I_{\min}$  is the PL intensity of the sample with lowest intensity. The PL peak locations are not given because the emissions of several samples are too weak to be measured.



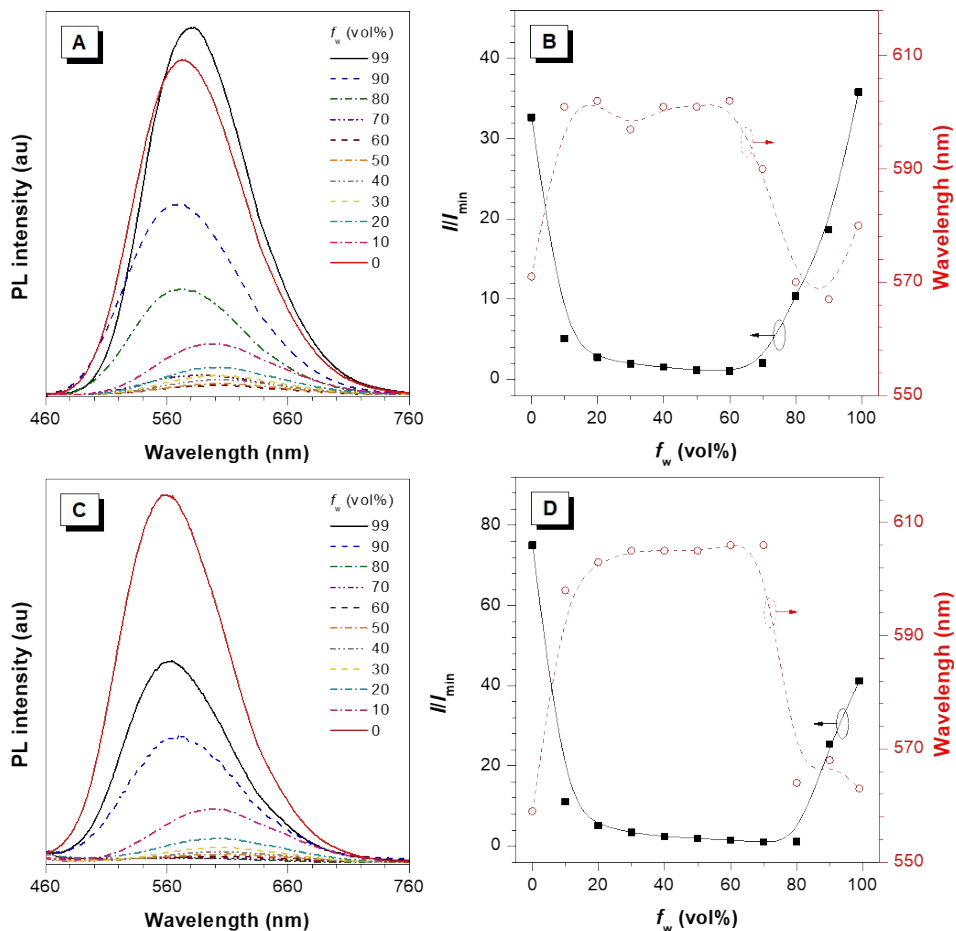

**Figure S7.** PL spectra of (A)  $\alpha$ -TPA-PIO and (C)  $\beta$ -TPA-PIO in THF/water mixtures with different water fractions ( $f_w$ s), excited at 410 nm and 390 nm, respectively. Plots of  $I/I_{\min}$  and PL peak location vs.  $f_w$  for (B)  $\alpha$ -TPA-PIO and (D)  $\beta$ -TPA-PIO in THF/water mixtures with different  $f_w$ s;  $I_{\min}$  is the PL intensity of the sample with lowest intensity.

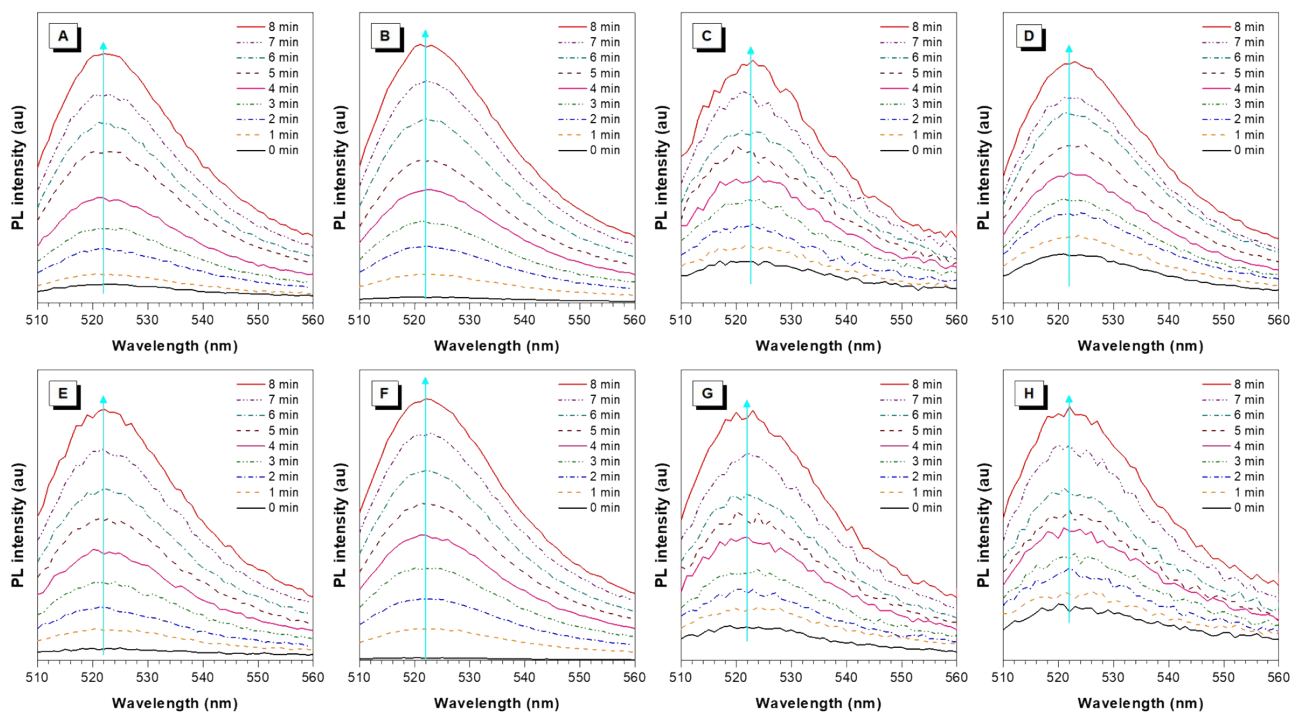

**Figure S8.** PL spectra of DCFH in PBS in the presence of (A)  $\alpha$ -TPA-PIO, (B)  $\beta$ -TPA-PIO, (C) CV, (D) pure DMSO, (E)  $\alpha$ -TPA-PIO + BSA, (F)  $\beta$ -TPA-PIO + BSA, (G) CV + BSA or (H) BSA after exposure to white light irradiation of  $20 \text{ mW cm}^{-2}$  with different time. [BSA] =  $500 \text{ nM}$ .

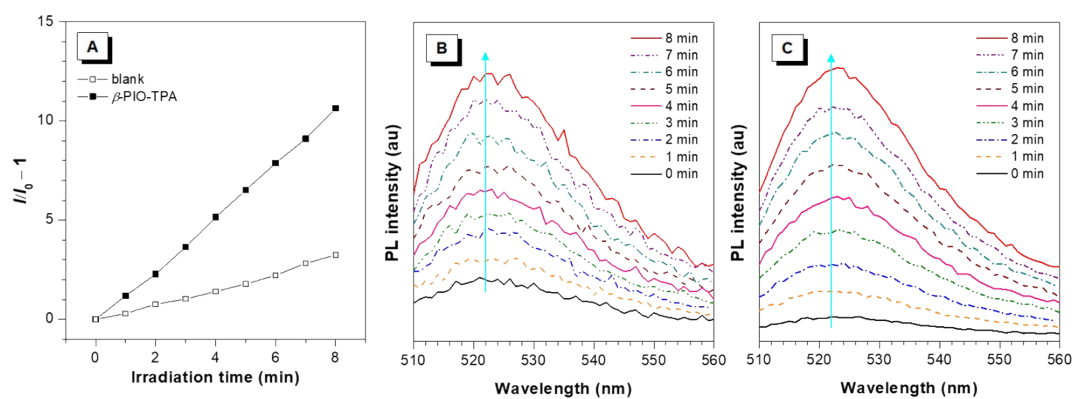

**Figure S9.** (A) Plots of relative PL intensity of DCFH for general ROS detection in the presence of  $\beta$ -TPA-PIO (without/with  $5 \mu\text{M}$  BSA) in PBS with 1% DMSO vs. irradiation time (white light,  $20 \text{ mW cm}^{-2}$ ).  $I_0$  and  $I$  are the PL intensity of indicator before and after irradiation, respectively. PL spectra of DCFH in PBS in present of (B) BSA or (C)  $\beta$ -TPA-PIO + BSA after exposure to white light irradiation of  $20 \text{ mW cm}^{-2}$  with different time. [BSA] =  $5 \mu\text{M}$ .

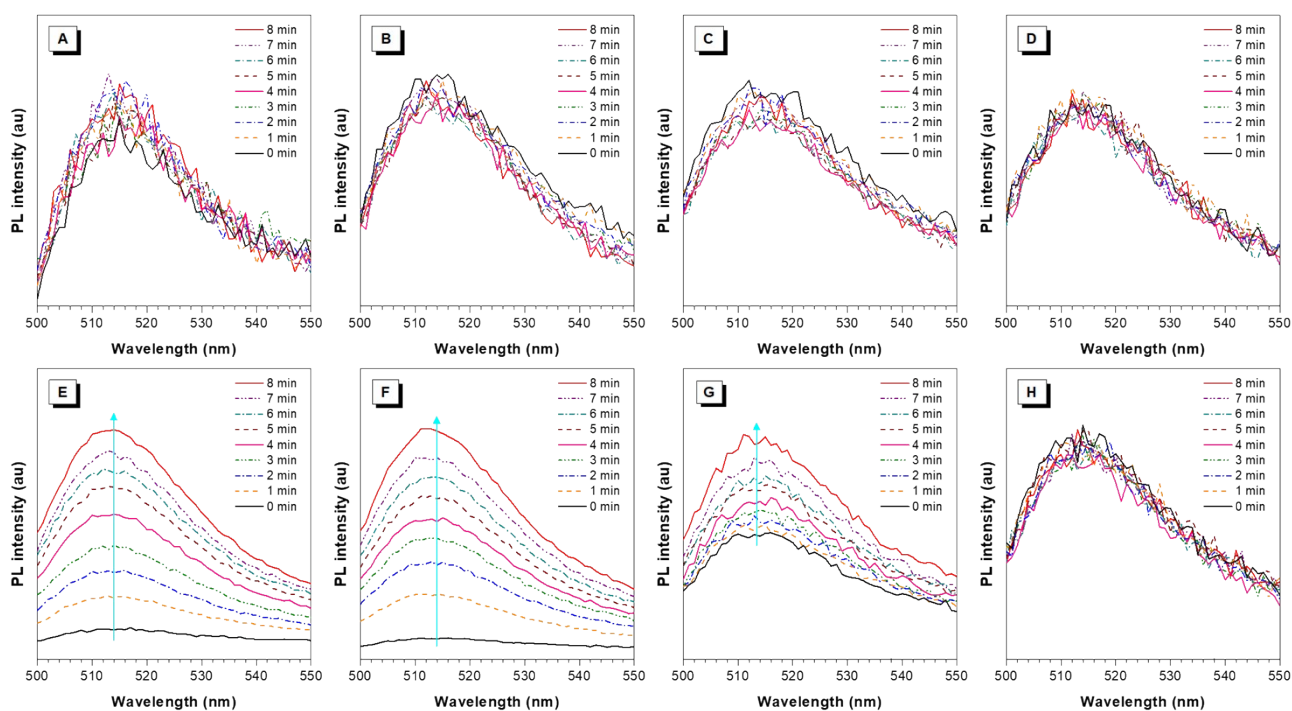

**Figure S10.** PL spectra of HPF in PBS in the presence of (A)  $\alpha$ -TPA-PIO, (B)  $\beta$ -TPA-PIO, (C) CV, (D) pure DMSO, (E)  $\alpha$ -TPA-PIO + BSA, (F)  $\beta$ -TPA-PIO + BSA, (G) CV + BSA or (H) BSA after exposure to white light irradiation of  $20 \text{ mW cm}^{-2}$  with different time. [BSA] =  $500 \text{ nM}$ .

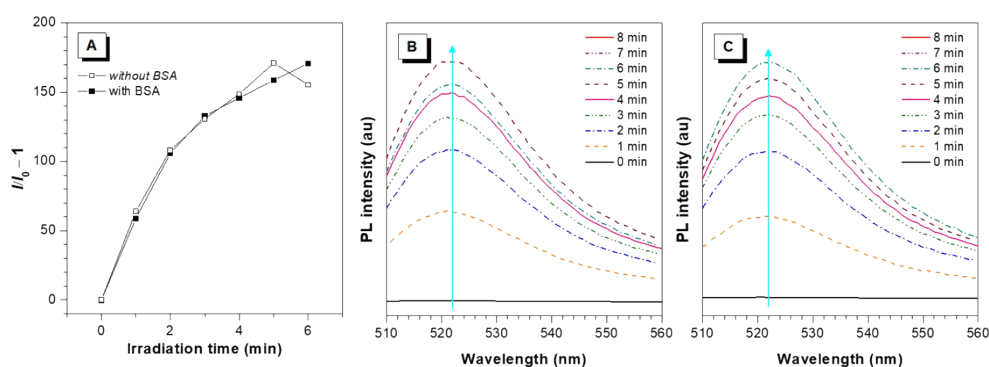

**Figure S11.** (A) Plots of relative PL intensity of DCFH for general ROS detection in the presence of  $\beta$ -TPA-PIO (without/with  $500 \text{ nM}$  BSA) in PBS with 1% DMSO vs. irradiation time (white light,  $20 \text{ mW cm}^{-2}$ ).  $I_0$  and  $I$  are the PL intensity of indicator before and after irradiation, respectively. PL spectra of DCFH in PBS in present of (B) BSA or (C) MB + BSA after exposure to white light irradiation of  $20 \text{ mW cm}^{-2}$  with different time. [BSA] =  $500 \text{ nM}$ .

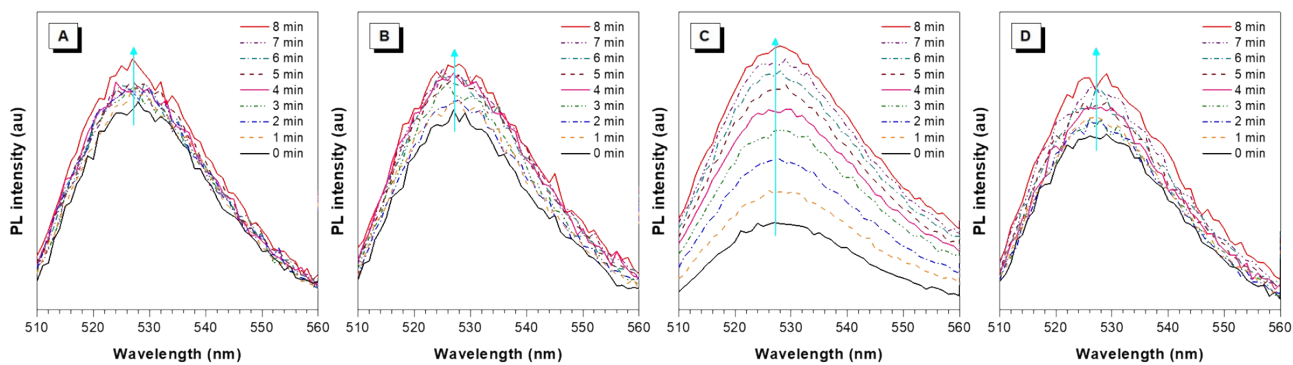

**Figure S12.** PL spectra of SOSG in PBS in the presence of (A)  $\alpha$ -TPA-PIO, (B)  $\beta$ -TPA-PIO, (C) MB or (D) pure DMSO after exposure to white light irradiation of  $20 \text{ mW cm}^{-2}$  with different time.

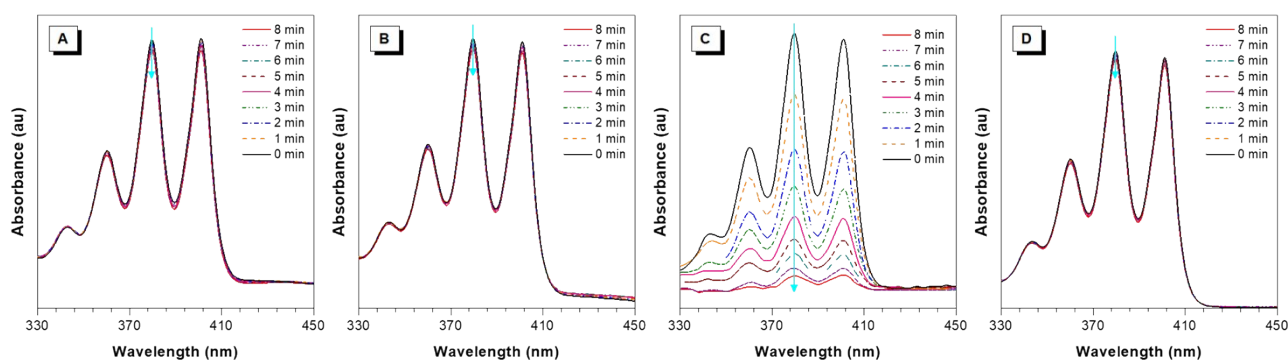

**Figure S13.** Absorption of ABDA in PBS in the presence of (A)  $\alpha$ -TPA-PIO, (B)  $\beta$ -TPA-PIO, (C) MB or (D) pure DMSO after exposure to white light irradiation of  $20 \text{ mW cm}^{-2}$  with different time.

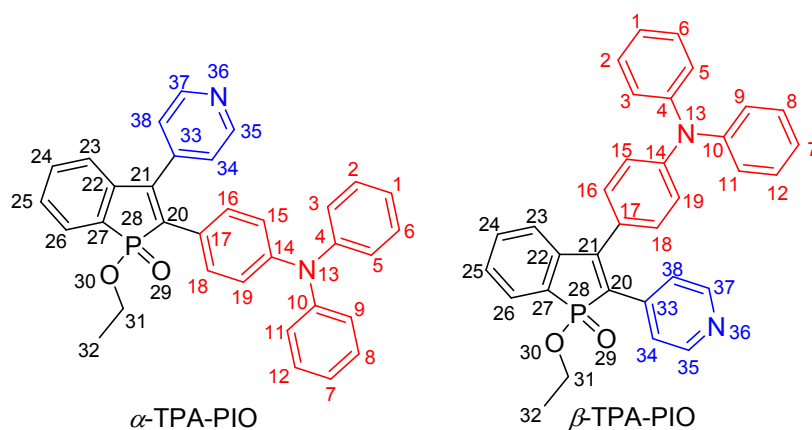

**Figure S14.** Atom numbers of  $\alpha$ -TPA-PIO and  $\beta$ -TPA-PIO.

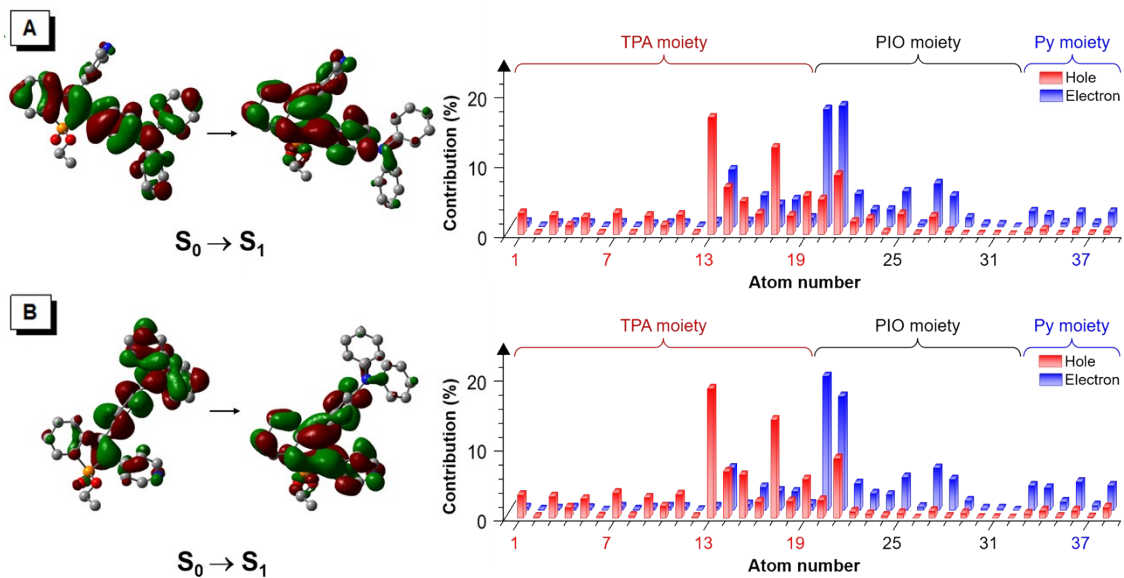

**Figure S15.** NTOs and atom contribution to hole and electron of the transition at the optimized  $S_0$  state structures of (A)  $\alpha$ -TPA-PIO and (B)  $\beta$ -TPA-PIO.

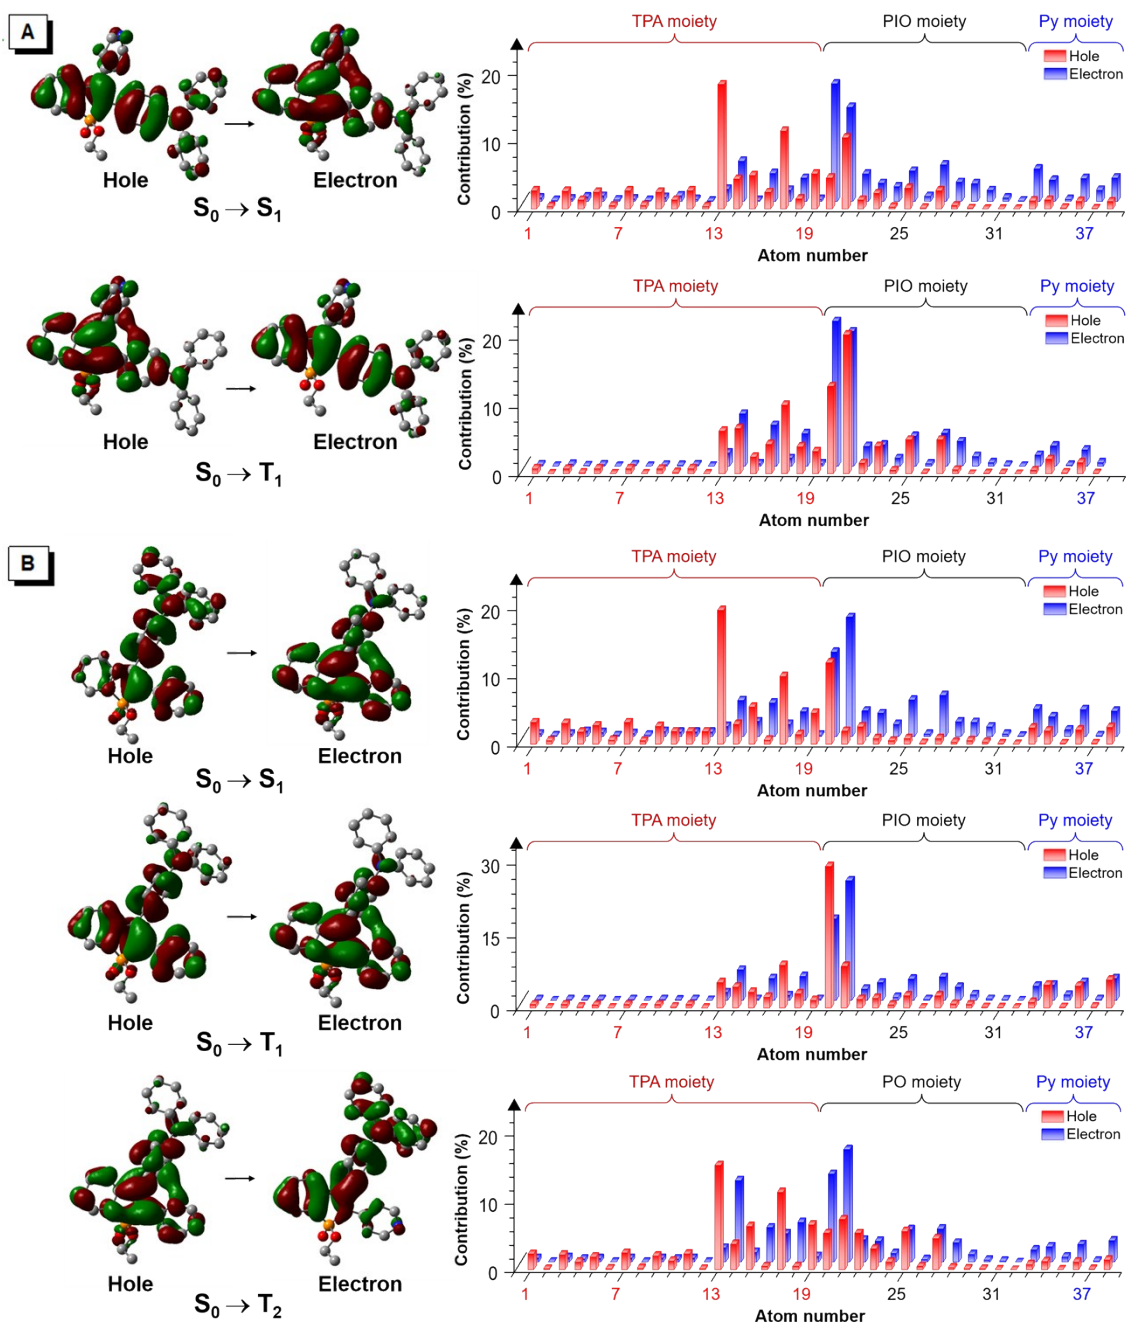

**Figure S16.** NTOs and atom contribution to hole and electron of the transition at the optimized  $S_1$  state structures of (A)  $\alpha$ -TPA-PIO and (B)  $\beta$ -TPA-PIO.

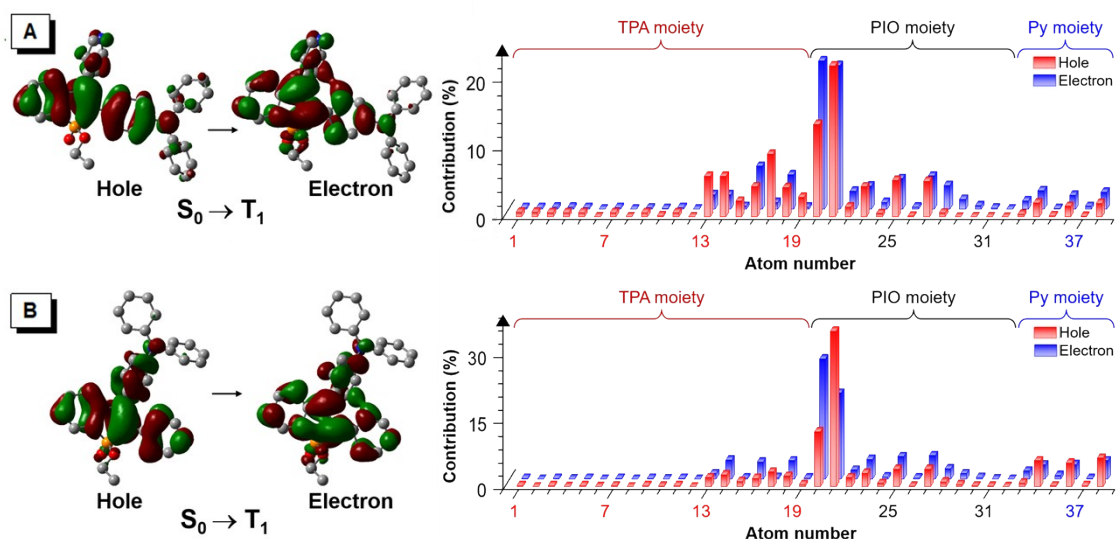

**Figure S17.** NTOs and atom contribution to hole and electron of the transition at the optimized  $T_1$  state structures of (A)  $\alpha$ -TPA-PIO and (B)  $\beta$ -TPA-PIO.

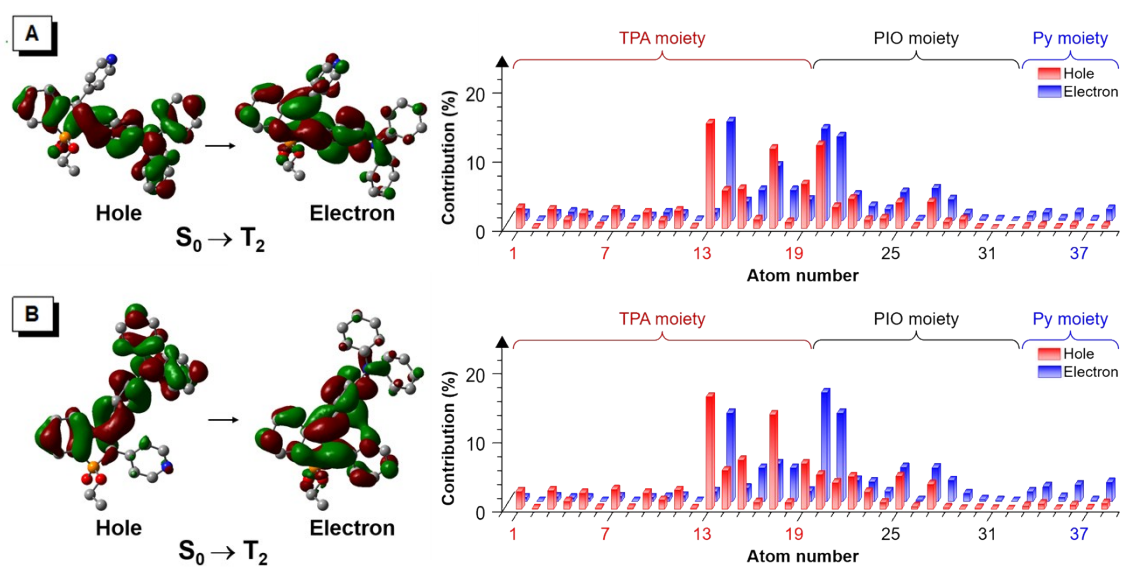

**Figure S18.** NTOs and atom contribution to hole and electron of the transition at the optimized  $T_2$  state structures of (A)  $\alpha$ -TPA-PIO and (B)  $\beta$ -TPA-PIO.

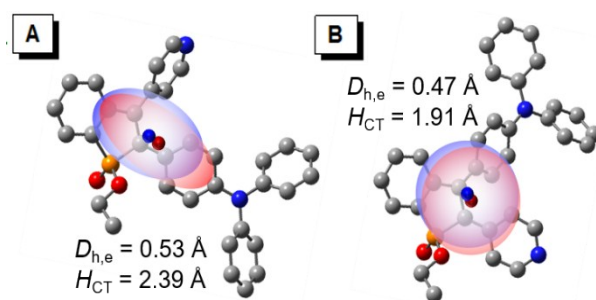

**Figure S19.** Centroids of hole (red region) and electron (blue region) of the  $S_0 \rightarrow T_1$  transition of the optimized  $T_1$  state structures of (A)  $\alpha$ -TPA-PIO and (B)  $\beta$ -TPA-PIO, with labels of the centers of hole (red point) and electron (blue point) and  $D_{h,e}$  and  $H_{CT}$ .

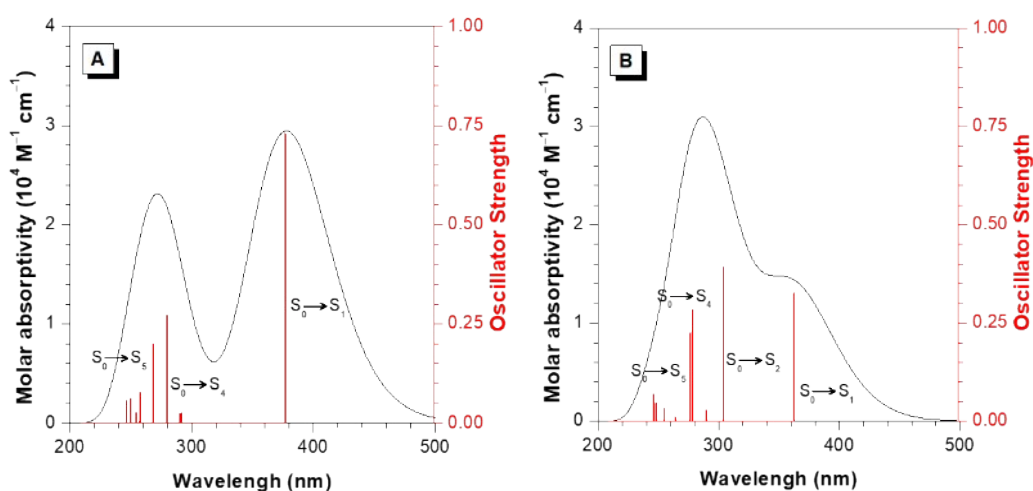

**Figure S20.** Calculated absorption spectra with oscillator strengths of (A)  $\alpha$ -TPA-PIO and (B)  $\beta$ -TPA-PIO.

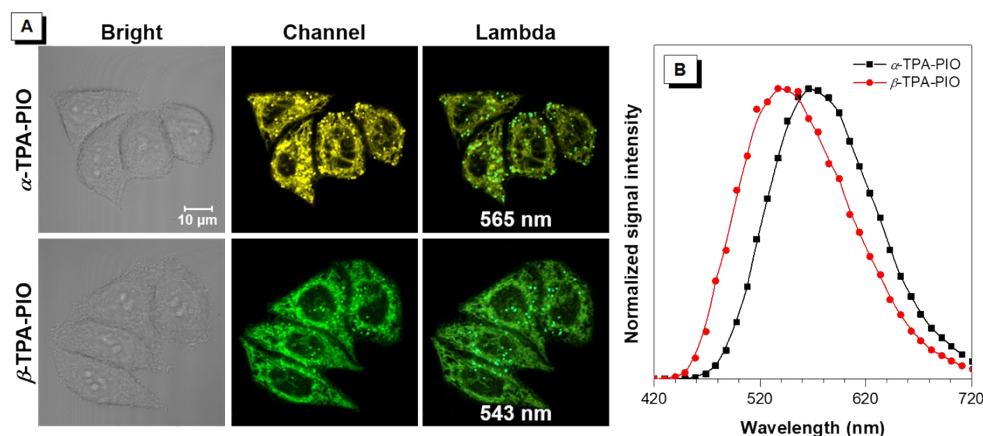

**Figure S21.** (A) Fluorescence channel and lambda stack images with bright-field of HeLa cells incubated with  $1 \mu\text{M}$   $\alpha$ -TPA-PIO or  $\beta$ -TPA-PIO for 30 min using CLSM. (B) Normalized lambda spectra (plots of emission signal intensity vs. tracking wavelength) of  $\alpha$ -TPA-PIO or  $\beta$ -TPA-PIO.



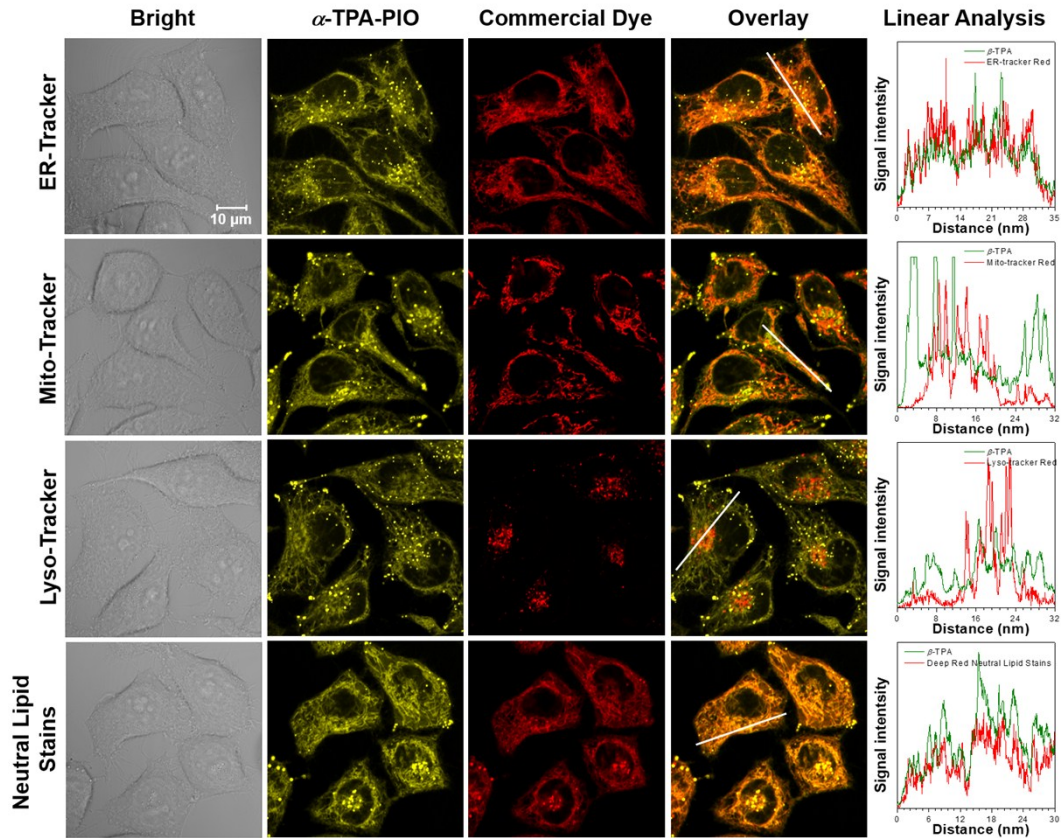

**Figure S22.** Colocalization images of HeLa cells co-stained with  $\alpha$ -TPA-PIO and ER-Tracker Red, Mito-Tracker Red, Lyso-Tracker Red or HCS LipidTOX™ Deep Red neutral lipid stain, with the intensity profile of synchrony for the drew white line.

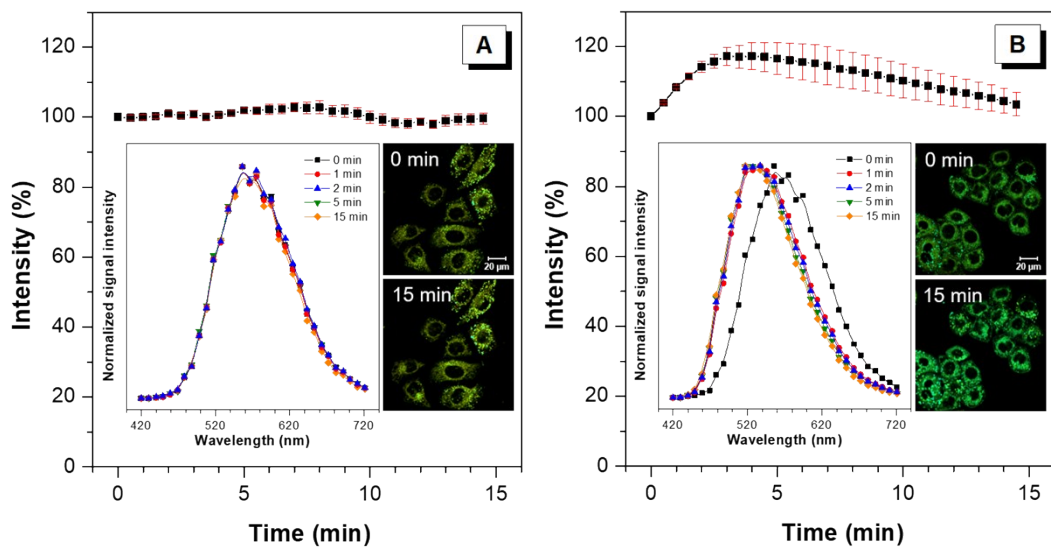

**Figure S23.** Photobleaching resistance assay of (A)  $\alpha$ -TPA-PIO and (B)  $\beta$ -TPA-PIO in HeLa cells with continuous excitation and sequential scanning of irradiation using 405 nm laser of 10% power. Inset: Lambda stacking images and normalized lambda spectra at different time.

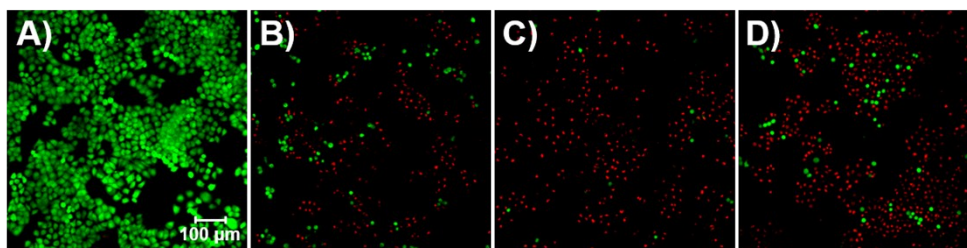

**Figure S24.** Live/dead cell co-staining assay by using calcein-AM with green fluorescence for live cells and PI with red fluorescence for dead cells: (A) the control group, (B)  $\alpha$ -TPA-PIO and (C)  $\beta$ -TPA-PIO in normal condition and (D)  $\beta$ -TPA-PIO in hypoxic condition at the concentration of 10  $\mu$ M, in presence of white light irradiation of 20 mW  $\text{cm}^{-2}$  for 30 min.

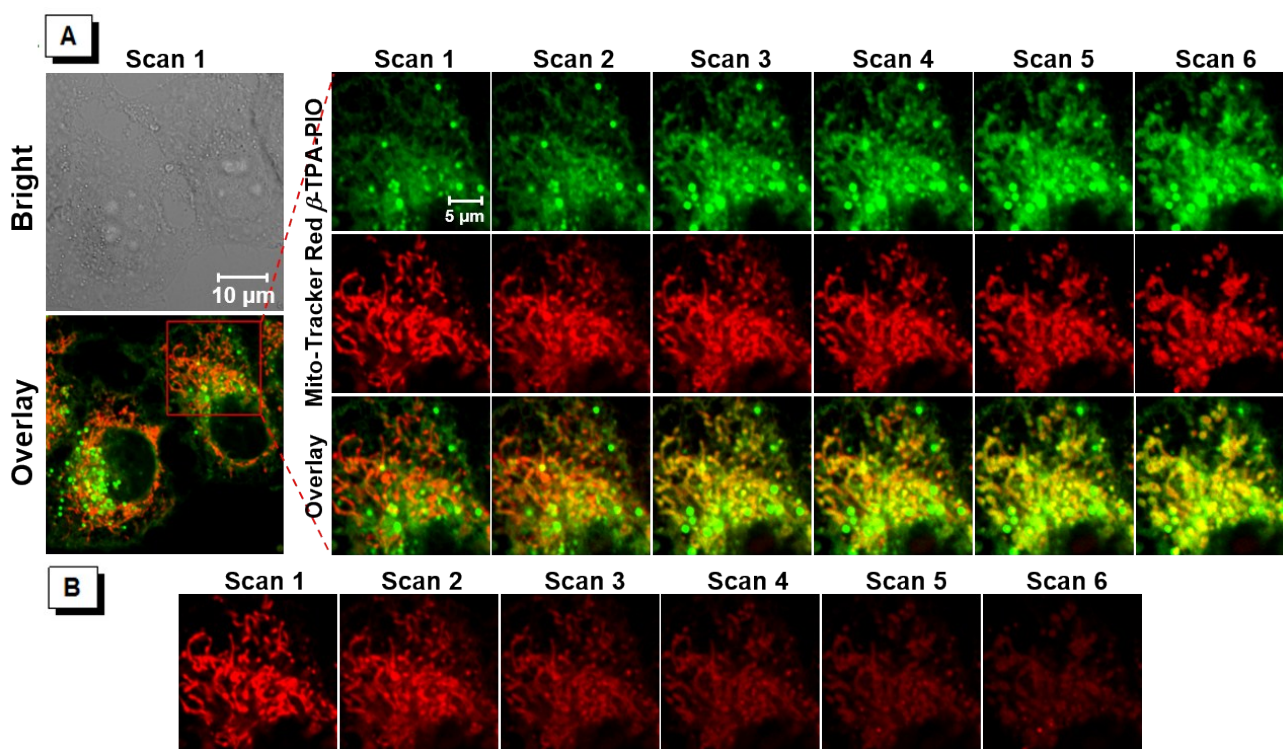

**Figure S25.** (A) Colocalization images of HeLa cells co-stained with  $\beta$ -TPA-PIO and Mito-Tracker Red (with brightness correction using ZEN 2012 (black edition)) with continuous irradiation of 405 nm laser of 1% power. (B) Original picture of the colocalization images of HeLa cells stained with Mito-Tracker Red without brightness correction. The signal intensity declines with continuous scanning for the poor photostability of Mito-Tracker Red.

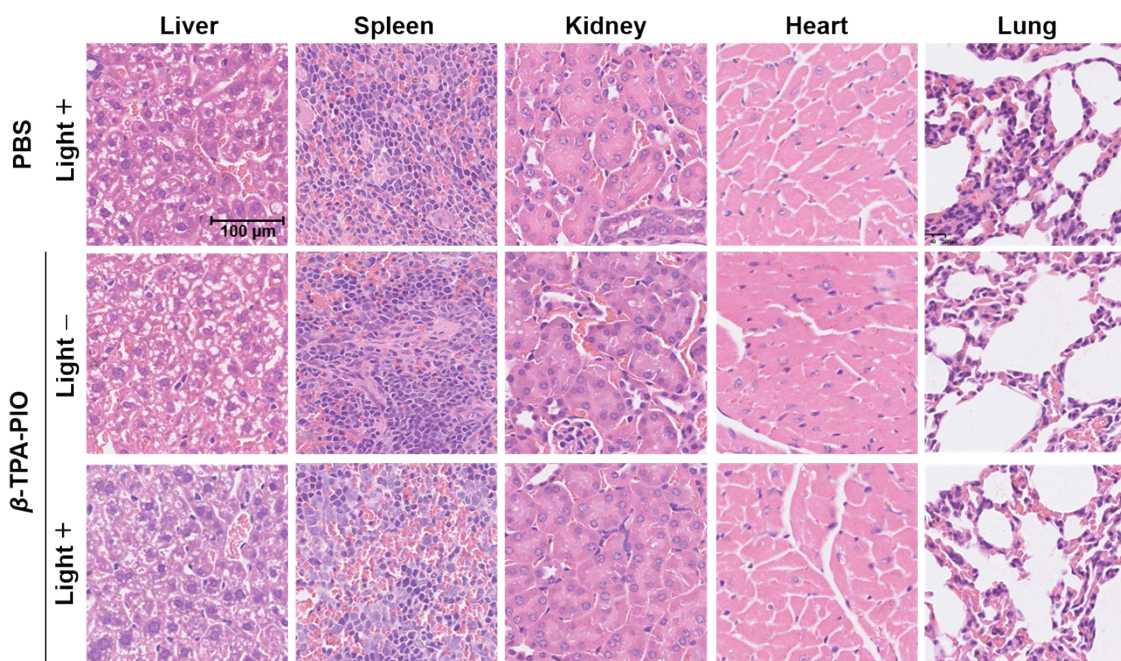

**Figure S26.** Histological H&E staining of various organ tissues in mice after different treatments.

**Table S1.** Photophysical properties of  $\alpha$ -TPA-PIO and  $\beta$ -TPA-PIO in different states.

| State             | $\Delta f^a$ | $\alpha$ -TPA-PIO                |                                                           |                                 |                            | $\beta$ -TPA-PIO               |                                                         |                               |                          |
|-------------------|--------------|----------------------------------|-----------------------------------------------------------|---------------------------------|----------------------------|--------------------------------|---------------------------------------------------------|-------------------------------|--------------------------|
|                   |              | $\lambda_{\text{abs}}^b$<br>(nm) | $\epsilon^c$<br>( $10^4 \text{ M}^{-1} \text{ cm}^{-1}$ ) | $\lambda_{\text{em}}^d$<br>(nm) | $\Phi_{\text{F}}^e$<br>(%) | $\lambda_{\text{abs}}$<br>(nm) | $\epsilon$<br>( $10^4 \text{ M}^{-1} \text{ cm}^{-1}$ ) | $\lambda_{\text{em}}$<br>(nm) | $\Phi_{\text{F}}$<br>(%) |
| Toluene           | 0.014        | 417                              | 1.91                                                      | 545                             | 50.2                       | 399                            | 0.79                                                    | 520                           | 5.8                      |
| Butyl ether       | 0.096        | 412                              | 1.92                                                      | 534                             | 44.7                       | 392                            | 0.72                                                    | 511                           | 5.5                      |
| Isopropyl ether   | 0.145        | 409                              | 1.83                                                      | 540                             | 43.7                       | 390                            | 0.69                                                    | 521                           | 4.6                      |
| Ethyl ether       | 0.167        | 407                              | 1.78                                                      | 543                             | 33.0                       | 390                            | 0.73                                                    | 525                           | 3.4                      |
| THF               | 0.210        | 411                              | 1.76                                                      | 563                             | 44.6                       | 393                            | 0.76                                                    | 560                           | 12.2                     |
| Ethyl acetate     | 0.200        | 407                              | 1.64                                                      | 565                             | 41.2                       | 391                            | 0.69                                                    | 563                           | 10.3                     |
| Isopropanol       | 0.273        | 420                              | 1.39                                                      | 598                             | 17.2                       | 410                            | 0.66                                                    | 598                           | 3.1                      |
| Acetonitrile      | 0.305        | 407                              | 1.67                                                      | 602                             | 15.3                       | 394                            | 0.71                                                    | 613                           | 3.7                      |
| DMF               | 0.276        | 411                              | 1.72                                                      | 600                             | 18.7                       | 409                            | 0.69                                                    | 611                           | 5.0                      |
| DMSO              | 0.265        | 414                              | 1.69                                                      | 607                             | 12.5                       | 402                            | 0.70                                                    | 614                           | 1.6                      |
| PBS <sup>f</sup>  | /            | 430                              | 1.76                                                      | 576                             | 44.8                       | 408                            | 0.98                                                    | 563                           | 8.6                      |
| Film <sup>g</sup> | /            | /                                | /                                                         | 573                             | 33.7                       | /                              | /                                                       | 560                           | 15.3                     |

<sup>a</sup> Orientation polarizability,  $\Delta f = (\epsilon - 1)/(2\epsilon + 1) - (n^2 - 1)/(2n^2 + 1)$ , where  $\epsilon$  = dielectric constant and  $n$  = refractive index; <sup>b</sup> Absorption maximum measured in solution (10  $\mu\text{M}$ ); <sup>c</sup> Molar absorptivity; <sup>d</sup> Emission maxima measured in solution (10  $\mu\text{M}$ ) or film, excited at  $\lambda_{\text{abs}}$ ; <sup>e</sup> Absolute fluorescence quantum yield determined using a calibrated integrating sphere; <sup>f</sup> With 1 vol% DMSO; <sup>g</sup> Drop-cast film on a quartz plate.

**Table S2.** Orthogonal coordinates for optimized  $S_0$ ,  $S_1$ ,  $T_1$ , and  $T_2$  state structures of  $\alpha$ -TPA-PIO.

|     | Opt ( $S_0$ )             | Opt ( $S_1$ )             | Opt ( $T_1$ )             | Opt ( $T_2$ )             |
|-----|---------------------------|---------------------------|---------------------------|---------------------------|
| C1  | 5.6142, 3.6510, 0.4336    | 5.6541, 3.5663, 0.3696    | 4.8334, 3.5101, 3.9209    | 5.3252, 3.6318, 0.9396    |
| C2  | 4.5493, 3.4994, -0.4504   | 4.6281, 3.4065, -0.5585   | 4.2338, 3.3818, 2.6693    | 4.2023, 3.5321, 0.1212    |
| C3  | 3.9388, 2.2619, -0.6135   | 3.9643, 2.1923, -0.6694   | 3.6676, 2.1724, 2.2806    | 3.6749, 2.2900, -0.2011   |
| C4  | 4.3801, 1.1613, 0.1258    | 4.3252, 1.1304, 0.1639    | 3.6857, 1.0855, 3.1598    | 4.2761, 1.1285, 0.3022    |
| C5  | 5.4441, 1.3141, 1.0183    | 5.3558, 1.2838, 1.0938    | 4.2872, 1.2087, 4.4153    | 5.4037, 1.2258, 1.1283    |
| C6  | 6.0593, 2.5518, 1.1625    | 6.0160, 2.5013, 1.1906    | 4.8611, 2.4192, 4.7882    | 5.9211, 2.4737, 1.4390    |
| C7  | 6.1994, -3.5390, -0.2567  | 6.0063, -3.6081, 0.0760   | 5.3438, -3.6480, 3.5695   | 6.2604, -3.3842, -0.8592  |
| C8  | 6.5528, -2.3784, -0.9390  | 6.3758, -2.5186, -0.7094  | 5.9572, -2.5435, 2.9800   | 6.5919, -2.1033, -1.3008  |
| C9  | 5.7442, -1.2500, -0.8776  | 5.6002, -1.3676, -0.7231  | 5.2236, -1.3943, 2.7065   | 5.7648, -1.0267, -1.0209  |
| C10 | 4.5733, -1.2673, -0.1150  | 4.4450, -1.3057, 0.0594   | 3.8658, -1.3473, 3.0326   | 4.5902, -1.2272, -0.2836  |
| C11 | 4.2225, -2.4296, 0.5777   | 4.0754, -2.3905, 0.8580   | 3.2485, -2.4468, 3.6352   | 4.2555, -2.5119, 0.1636   |
| C12 | 5.0290, -3.5581, 0.4969   | 4.8561, -3.5389, 0.8576   | 3.9893, -3.5956, 3.8934   | 5.0908, -3.5807, -0.1289  |
| N13 | 3.7605, -0.1064, -0.0349  | 3.6540, -0.1213, 0.0558   | 3.1167, -0.1620, 2.7694   | 3.7278, -0.1389, -0.0094  |
| C14 | 2.3579, -0.2097, -0.0819  | 2.2822, -0.1856, -0.0227  | 1.8780, -0.2257, 2.1595   | 2.3500, -0.3076, -0.0562  |
| C15 | 1.5525, 0.6590, 0.6683    | 1.4714, 0.8430, 0.5186    | 0.9119, 0.7936, 2.3534    | 1.5029, 0.3989, 0.8526    |
| C16 | 0.1731, 0.5625, 0.6147    | 0.1075, 0.7902, 0.4213    | -0.3104, 0.7409, 1.7356   | 0.1445, 0.2469, 0.7899    |
| C17 | -0.4542, -0.4084, -0.1783 | -0.5602, -0.3035, -0.2241 | -0.6773, -0.3467, 0.8706  | -0.4599, -0.5793, -0.2003 |
| C18 | 0.3572, -1.2914, -0.9033  | 0.2802, -1.3436, -0.7419  | 0.3140, -1.3777, 0.7082   | 0.3877, 1.2951, -1.0902   |
| C19 | 1.7385, -1.1877, -0.8694  | 1.6401, -1.2915, -0.6511  | 1.5341, -1.3212, 1.3191   | 1.7515, -1.1767, -1.0201  |
| C20 | -1.9157, -0.5426, -0.2344 | -1.9652, -0.4187, -0.3176 | -1.9187, -0.4670, 0.2326  | -1.9115, -0.6795, -0.3053 |
| C21 | -2.8689, 0.4135, -0.1805  | -2.9614, 0.5917, -0.0885  | -2.9992, 0.5353, 0.1515   | -2.8527, 0.3531, -0.2979  |
| C22 | -4.2746, -0.0867, -0.1782 | -4.2886, 0.0572, 0.0936   | -4.2744, -0.0389, -0.1797 | -4.2341, -0.0992, -0.2233 |
| C23 | -5.4283, 0.6884, -0.1865  | -5.4988, 0.7706, 0.2562   | -5.5005, 0.6382, -0.3884  | -5.4003, 0.6833, -0.3294  |
| C24 | -6.6717, 0.0538, -0.2264  | -6.6955, 0.0868, 0.3627   | -6.6300, -0.0756, -0.7475 | -6.6403, 0.0677, -0.3430  |
| C25 | -6.7689, -1.3319, -0.2763 | -6.7503, -1.3125, 0.2741  | -6.5843, -1.4640, -0.9493 | -6.7662, -1.3297, -0.2719 |
| C26 | -5.6118, -2.1152, -0.2880 | -5.5823, -2.0332, 0.0504  | -5.3759, -2.1428, -0.8107 | -5.6238, -2.1240, -0.1955 |
| C27 | -4.3814, -1.4852, -0.2249 | -4.3703, -1.3611, -0.0295 | -4.2394, -1.4423, -0.4252 | -4.3805, -1.5154, -0.1439 |
| P28 | -2.7145, -2.1739, -0.2732 | -2.7567, -2.0247, -0.4348 | -2.5527, -2.0503, -0.3043 | -2.7479, -2.2619, -0.1027 |
| O29 | -2.4109, -3.1280, -1.3702 | -2.6557, -2.8806, -1.6528 | -2.0050, -2.7718, -1.4938 | -2.4805, -3.3961, -1.0275 |
| O30 | -2.3646, -2.7143, 1.1995  | -2.1668, -2.7820, 0.8725  | -2.4426, -2.9417, 1.0511  | -2.3978, -2.6020, 1.4370  |
| C31 | -2.9438, -3.9593, 1.6517  | -2.5772, -4.1372, 1.1338  | -2.9434, -4.2896, 1.0073  | -3.0183, -3.7513, 2.0506  |
| C32 | -2.3514, -4.2748, 3.0032  | -1.7619, -4.6492, 2.2975  | -2.4562, -5.0077, 2.2455  | -2.4322, -3.9095, 3.4326  |
| C33 | -2.5977, 1.8701, -0.1591  | -2.6890, 2.0097, -0.2178  | -2.7479, 1.9683, 0.1754   | -2.4694, 1.7703, -0.3557  |
| C34 | -1.8736, 2.4758, -1.1848  | -1.7996, 2.4886, -1.2022  | -1.6095, 2.5097, -0.4519  | -1.4617, 2.2097, -1.2254  |
| C35 | -1.6307, 3.8415, -1.1145  | -1.5468, 3.8479, -1.2936  | -1.3991, 3.8805, -0.4151  | -1.1180, 3.5521, -1.2428  |
| N36 | -2.0501, 4.6174, -0.1123  | -2.0829, 4.7679, -0.4854  | -2.2091, 4.7476, 0.2048   | -1.6852, 4.4780, -0.4613  |
| C37 | -2.7457, 4.0314, 0.8636   | -2.9155, 4.3152, 0.4615   | -3.2806, 4.2318, 0.8183   | -2.6384, 4.0579, 0.3724   |
| C38 | -3.0498, 2.6752, 0.8859   | -3.2490, 2.9827, 0.6347   | -3.5934, 2.8790, 0.8345   | -3.0616, 2.7377, 0.4644   |

**Table S3.** Orthogonal coordinates of heavy atoms for optimized S<sub>0</sub>, S<sub>1</sub>, T<sub>1</sub>, and T<sub>2</sub> state structures of  $\beta$ -TPA-PIO.

|     | Opt (S <sub>0</sub> )     | Opt (S <sub>1</sub> )     | Opt (T <sub>1</sub> )     | Opt (T <sub>2</sub> )     |
|-----|---------------------------|---------------------------|---------------------------|---------------------------|
| C1  | -4.8187, 8.7939, 0.3005   | -4.7860, 8.9038, -0.0752  | -4.7147, 9.0528, -0.5814  | -4.7005, 8.9867, 0.0975   |
| C2  | -4.9795, 7.7297, -0.5827  | -4.9055, 7.8059, -0.9231  | -4.8371, 7.8513, -1.2740  | -4.9174, 7.8800, -0.7194  |
| C3  | -3.9592, 6.8043, -0.7645  | -3.8944, 6.8565, -0.9882  | -3.8429, 6.8844, -1.1899  | -3.9426, 6.9009, -0.8486  |
| C4  | -2.7667, 6.9267, -0.0465  | -2.7582, 7.0041, -0.1883  | -2.7182, 7.1069, -0.3909  | -2.7383, 7.0286, -0.1476  |
| C5  | -2.6072, 7.9903, 0.8450   | -2.6295, 8.1075, 0.6589   | -2.5960, 8.3104, 0.3080   | -2.5149, 8.1399, 0.6733   |
| C6  | -3.6266, 8.9207, 1.0078   | -3.6450, 9.0519, 0.7105   | -3.5878, 9.2781, 0.2042   | -3.4968, 9.1119, 0.7897   |
| C7  | 2.2490, 7.3746, -0.5223   | 2.2486, 7.4103, -0.4447   | 2.3212, 7.3992, -0.4841   | 2.3023, 7.1186, -0.4920   |
| C8  | 1.2167, 8.0467, -1.1705   | 1.2635, 7.9957, -1.2364   | 1.3773, 7.9225, -1.3632   | 1.3378, 7.8622, -1.1711   |
| C9  | -0.0907, 7.5839, -1.0842  | -0.0469, 7.5419, -1.1769  | 0.0553, 7.4979, -1.3123   | -0.0007, 7.5081, -1.1004  |
| C10 | -0.3823, 6.4442, -0.3298  | -0.3738, 6.4922, -0.3150  | -0.3368, 6.5494, -0.3649  | -0.3811, 6.3969, -0.3388  |
| C11 | 0.6526, 5.7750, 0.3301    | 0.6084, 5.9075, 0.4891    | 0.6066, 6.0312, 0.5253    | 0.5834, 5.6494, 0.3481    |
| C12 | 1.9591, 6.2356, 0.2237    | 1.9160, 6.3673, 0.4161    | 1.9296, 6.4502, 0.4563    | 1.9193, 6.0140, 0.2649    |
| N13 | -1.7209, 5.9827, -0.2274  | -1.7192, 6.0333, -0.2438  | -1.6931, 6.1269, -0.3010  | -1.7463, 6.0218, -0.2644  |
| C14 | -2.0065, 4.6051, -0.2664  | -2.0102, 4.6880, -0.2266  | -2.0134, 4.7700, -0.1730  | -2.1015, 4.6850, -0.2888  |
| C15 | -3.0543, 4.0701, 0.4942   | -3.1917, 4.2145, 0.4114   | -3.1787, 4.3670, 0.5048   | -3.2211, 4.2122, 0.4603   |
| C16 | -3.3307, 2.7118, 0.4513   | -3.4792, 2.8777, 0.4420   | -3.5106, 3.0332, 0.6123   | -3.5225, 2.8766, 0.4829   |
| C17 | -2.5541, 1.8459, -0.3234  | -2.6134, 1.9109, -0.1481  | -2.6937, 2.0151, 0.0627   | -2.7448, 1.9313, -0.2444  |
| C18 | -1.5107, 2.3833, -1.0827  | -1.4163, 2.4050, -0.7581  | -1.4919, 2.4383, -0.5604  | -1.6616, 2.4212, -1.0297  |
| C19 | -1.2464, 3.7422, -1.0682  | -1.1337, 3.7428, -0.8129  | -1.1716, 3.7723, -0.6948  | -1.3367, 3.7480, -1.0469  |
| C20 | -2.7879, 0.3876, -0.3010  | -2.9017, 0.5099, -0.1338  | -3.0271, 0.6205, 0.1250   | -2.9577, 0.4925, -0.1365  |
| C21 | -1.8408, -0.5322, -0.0093 | -1.8835, -0.4957, -0.0247 | -1.9438, -0.4481, 0.1437  | -1.9111, -0.4365, 0.0512  |
| C22 | -4.1251, -0.1820, -0.6473 | -4.2352, -0.0473, -0.3602 | -4.3220, 0.0252, -0.0134  | -4.2428, -0.1047, -0.4412 |
| C23 | -5.2485, 0.5341, -1.0416  | -5.4287, 0.6494, -0.6254  | -5.5836, 0.6772, -0.0468  | -5.4493, 0.5619, -0.7408  |
| C24 | -6.4159, -0.1597, -1.3676 | -6.5938, -0.0496, -0.9007 | -6.7402, -0.0512, -0.2375 | -6.5755, -0.1758, -1.0601 |
| C25 | -6.4597, -1.5480, -1.3236 | -6.6087, -1.4475, -0.9632 | -6.7141, -1.4403, -0.4326 | -6.5332, -1.5773, -1.1246 |
| C26 | -5.3254, -2.2744, -0.9515 | -5.4272, -2.1525, -0.7687 | -5.4906, -2.0984, -0.4740 | -5.3358, -2.2526, -0.8728 |
| C27 | -4.1774, -1.5836, -0.6054 | -4.2623, -1.4611, -0.4565 | -4.3194, -1.3829, -0.2651 | -4.2120, -1.5264, -0.5268 |
| P28 | -2.5420, -2.1959, -0.1453 | -2.6005, -2.1158, -0.2932 | -2.6468, -1.9980, -0.4544 | -2.5239, -2.0879, -0.2362 |
| O29 | -1.9167, -3.1957, -1.0483 | -2.1256, -3.0338, -1.3690 | -2.2679, -2.5436, -1.7849 | -1.9411, -2.9923, -1.2688 |
| O30 | -2.5994, -2.6399, 1.3990  | -2.4648, -2.7921, 1.1735  | -2.3194, -2.9947, 0.7663  | -2.4768, -2.7488, 1.2421  |
| C31 | -3.2182, -3.9011, 1.7420  | -2.9736, -4.1255, 1.3662  | -2.8240, -4.3480, 0.7367  | -2.9304, -4.1055, 1.4061  |
| C32 | -3.0815, -4.0921, 3.2324  | -2.6192, -4.5585, 2.7687  | -2.0646, -5.1448, 1.7697  | -2.6096, -4.5356, 2.8177  |
| C33 | -0.4536, -0.3157, 0.4334  | -0.5655, -0.3619, 0.5004  | -0.7090, -0.3698, 0.8365  | -0.5801, -0.1982, 0.5607  |
| C34 | 0.5635, -1.1707, 0.0010   | 0.4196, -1.3568, 0.2539   | 0.2975, -1.3462, 0.6263   | 0.4359, -1.1639, 0.3965   |
| C35 | 1.8621, -0.9523, 0.4455   | 1.6956, -1.1997, 0.7492   | 1.5026, -1.2315, 1.2887   | 1.6932, -0.9447, 0.9313   |
| N36 | 2.2048, 0.0298, 1.2794    | 2.1003, -0.1500, 1.4879   | 1.7887, -0.2468, 2.1543   | 2.0393, 0.1501, 1.6199    |
| C37 | 1.2255, 0.8337, 1.7047    | 1.1733, 0.7732, 1.7545    | 0.8381, 0.6673, 2.3733    | 1.0769, 1.0643, 1.7890    |
| C38 | -0.1012, 0.7073, 1.3201   | -0.1390, 0.7242, 1.3098   | -0.4007, 0.6642, 1.7539   | -0.2102, 0.9522, 1.2913   |

**Table S4.** Orthogonal coordinates of heavy atoms for optimized structures of  $\alpha$ -TPA-PIO<sup>•-</sup> and  $\beta$ -TPA-PIO<sup>•-</sup>.

| $\alpha$ -TPA-PIO <sup>•-</sup> |                           | $\beta$ -TPA-PIO <sup>•-</sup> |                           |
|---------------------------------|---------------------------|--------------------------------|---------------------------|
| C1                              | 5.6631, 3.6419, -0.3826   | C1                             | -4.8913, 8.8888, -0.4226  |
| C2                              | 4.5147, 3.3503, -1.1132   | C2                             | -4.9659, 7.6814, -1.1115  |
| C3                              | 3.8931, 2.1136, -0.9952   | C3                             | -3.9242, 6.7644, -1.0489  |
| C4                              | 4.4083, 1.1426, -0.1271   | C4                             | -2.7888, 7.0380, -0.2773  |
| C5                              | 5.5566, 1.4434, 0.6172    | C5                             | -2.7200, 8.2479, 0.4236   |
| C6                              | 6.1780, 2.6780, 0.4801    | C6                             | -3.7602, 9.1648, 0.3409   |
| C7                              | 5.9262, -3.6660, 0.6675   | C7                             | 2.2983, 7.3257, -0.0935   |
| C8                              | 4.6804, -3.4747, 1.2580   | C8                             | 1.3673, 8.0313, -0.8506   |
| C9                              | 3.9697, -2.2989, 1.0516   | C9                             | 0.0379, 7.6305, -0.8931   |
| C10                             | 4.4943, -1.2898, 0.2343   | C10                            | -0.3878, 6.5178, -0.1579  |
| C11                             | 5.7425, -1.4903, -0.3698  | C11                            | 0.5490, 5.8123, 0.6070    |
| C12                             | 6.4502, -2.6640, -0.1450  | C12                            | 1.8790, 6.2126, 0.6296    |
| N13                             | 3.7625, -0.1046, 0.0082   | N13                            | -1.7367, 6.0977, -0.1982  |
| C14                             | 2.3401, -0.1676, -0.0711  | C14                            | -2.0389, 4.7085, -0.1775  |
| C15                             | 1.5459, 0.7014, 0.6794    | C15                            | -3.0562, 4.2152, 0.6419   |
| C16                             | 0.1635, 0.6512, 0.5930    | C16                            | -3.3464, 2.8575, 0.6613   |
| C17                             | -0.4923, -0.2823, -0.2389 | C17                            | -2.6221, 1.9419, -0.1187  |
| C18                             | 0.3326, -1.1645, -0.9716  | C18                            | -1.5985, 2.4574, -0.9329  |
| C19                             | 1.7143, -1.1055, -0.8959  | C19                            | -1.3176, 3.8129, -0.9731  |
| C20                             | -1.9399, -0.3907, -0.3242 | C20                            | -2.8875, 0.4982, -0.0818  |
| C21                             | -2.9250, 0.5738, 0.0063   | C21                            | -1.8699, -0.4903, -0.0284 |
| C22                             | -4.2774, 0.0312, 0.0825   | C22                            | -4.2175, -0.0344, -0.2992 |
| C23                             | -5.4938, 0.7205, 0.2593   | C23                            | -5.4202, 0.6762, -0.5001  |
| C24                             | -6.6988, 0.0335, 0.2274   | C24                            | -6.5971, -0.0058, -0.7652 |
| C25                             | -6.7522, -1.3450, -0.0134 | C25                            | -6.6284, -1.4035, -0.8736 |
| C26                             | -5.5670, -2.0368, -0.2430 | C26                            | -5.4453, -2.1215, -0.7211 |
| C27                             | -4.3535, -1.3631, -0.1807 | C27                            | -4.2660, -1.4513, -0.4234 |
| P28                             | -2.7047, -1.9778, -0.5249 | P28                            | -2.5989, -2.0952, -0.2690 |
| O29                             | -2.5354, -2.8263, -1.7475 | O29                            | -2.1405, -3.0575, -1.3210 |
| O30                             | -2.2022, -2.8035, 0.7954  | O30                            | -2.4713, -2.7822, 1.2091  |
| C31                             | -2.6516, -4.1528, 0.9674  | C31                            | -2.9881, -4.1067, 1.3859  |
| C32                             | -1.9491, -4.7266, 2.1769  | C32                            | -2.6419, -4.5608, 2.7854  |
| C33                             | -2.6684, 2.0049, 0.0761   | C33                            | -0.4991, -0.3647, 0.3913  |
| C34                             | -1.7680, 2.6340, -0.8089  | C34                            | 0.4442, -1.3872, 0.1189   |
| C35                             | -1.5432, 3.9954, -0.7158  | C35                            | 1.7507, -1.2677, 0.5503   |
| N36                             | -2.1254, 4.7990, 0.1857   | N36                            | 2.2355, -0.2209, 1.2364   |
| C37                             | -2.9711, 4.2057, 1.0361   | C37                            | 1.3472, 0.7441, 1.5092    |
| C38                             | -3.2700, 2.8521, 1.0272   | C38                            | 0.0167, 0.7293, 1.1295    |

**Table S5.** Structure parameters of  $\alpha$ -TPA-PIO,  $\beta$ -TPA-PIO and their radical anions  $\alpha$ -TPA-PIO $^{\bullet-}$  and  $\beta$ -TPA-PIO $^{\bullet-}$ .

|                           |                 | $\alpha$ -TPA | $\alpha$ -TPA $^{\bullet-}$ | $\Delta^a$ |                           |                 | $\beta$ -TPA | $\beta$ -TPA $^{\bullet-}$ | $\Delta^a$ |
|---------------------------|-----------------|---------------|-----------------------------|------------|---------------------------|-----------------|--------------|----------------------------|------------|
| <b>Bond Length</b><br>(Å) | C17-C20         | 1.469         | 1.456                       | -0.013     | <b>Bond Length</b><br>(Å) | C20-C33         | 1.472        | 1.439                      | -0.033     |
|                           | C21-C33         | 1.482         | 1.454                       | -0.028     |                           | C17-C21         | 1.477        | 1.468                      | -0.009     |
|                           | C20-C21         | 1.351         | 1.418                       | 0.067      |                           | C20-C21         | 1.352        | 1.420                      | 0.068      |
|                           | C21-C22         | 1.492         | 1.459                       | -0.033     |                           | C21-C22         | 1.494        | 1.449                      | -0.045     |
|                           | C22-C23         | 1.390         | 1.409                       | 0.019      |                           | C22-C23         | 1.389        | 1.411                      | 0.022      |
|                           | C23-C24         | 1.397         | 1.387                       | -0.01      |                           | C23-C24         | 1.397        | 1.386                      | -0.011     |
|                           | C24-C25         | 1.390         | 1.400                       | 0.010      |                           | C24-C25         | 1.390        | 1.402                      | 0.012      |
|                           | C25-C26         | 1.397         | 1.391                       | -0.006     |                           | C25-C26         | 1.397        | 1.392                      | -0.005     |
|                           | C26-C27         | 1.384         | 1.389                       | 0.005      |                           | C26-C27         | 1.384        | 1.389                      | 0.005      |
|                           | C22-C27         | 1.403         | 1.421                       | 0.018      |                           | C22-C27         | 1.403        | 1.423                      | 0.020      |
|                           | C27-P28         | 1.804         | 1.793                       | -0.011     |                           | C27-P28         | 1.806        | 1.794                      | -0.012     |
|                           | P28-C20         | 1.817         | 1.773                       | -0.044     |                           | P28-C20         | 1.811        | 1.779                      | -0.032     |
|                           | P28-O29         | 1.485         | 1.498                       | 0.013      |                           | P28-O29         | 1.485        | 1.498                      | 0.013      |
|                           | P28-O30         | 1.607         | 1.636                       | 0.029      |                           | P28-O30         | 1.608        | 1.635                      | 0.027      |
|                           | O30-C31         | 1.446         | 1.433                       | -0.013     |                           | O30-C31         | 1.446        | 1.433                      | -0.013     |
| C31-C32                   | 1.509           | 1.512         | 0.003                       | C31-C32    | 1.509                     | 1.511           | 0.002        |                            |            |
| <b>Torsion</b>            | C16-C17-C20-C21 | 35.3          | 21.5                        | -13.8      | <b>Torsion</b>            | C38-C33-C20-C21 | 38.1         | 15.4                       | -22.7      |
| <b>Angle</b>              | C17-C20-C21-C33 | 5.3           | 21.5                        | 15.8       | <b>Angle</b>              | C33-C20-C21-C17 | 5.0          | 20.5                       | 15.5       |
| <b>(°)</b>                | C20-C21-C33-C34 | 57.7          | 35.5                        | -22.2      | <b>(°)</b>                | C20-C21-C17-C18 | 52.9         | 42.7                       | -10.2      |

<sup>a</sup>  $\Delta = (\alpha\text{-TPA-PIO}^{\bullet-} - \alpha\text{-TPA-PIO})$  or  $(\beta\text{-TPA-PIO}^{\bullet-} - \beta\text{-TPA-PIO})$

**Table S6.** Atomic charges with hydrogens summed into heavy atoms of  $\alpha$ -TPA-PIO,  $\beta$ -TPA-PIO and their radical ions  $\alpha$ -TPA-PIO $^{\bullet-}$  and  $\beta$ -TPA-PIO $^{\bullet-}$ .

| Atomic number                 | $\alpha$ -TPA-PIO | $\alpha$ -TPA-PIO $^{\bullet-}$ | $\Delta^a$    | Atomic number                 | $\beta$ -TPA-PIO | $\beta$ -TPA-PIO $^{\bullet-}$ | $\Delta$      |
|-------------------------------|-------------------|---------------------------------|---------------|-------------------------------|------------------|--------------------------------|---------------|
| C1                            | -0.234            | -0.311                          | -0.076        | C1                            | -0.227           | -0.139                         | 0.088         |
| C2                            | 0.296             | 0.428                           | 0.133         | C2                            | 0.211            | 0.126                          | -0.084        |
| C3                            | -0.213            | -0.328                          | -0.116        | C3                            | -0.135           | -0.117                         | 0.018         |
| C4                            | 0.118             | 0.090                           | -0.027        | C4                            | 0.109            | 0.069                          | -0.040        |
| C5                            | -0.168            | -0.066                          | 0.102         | C5                            | -0.218           | -0.100                         | 0.119         |
| C6                            | 0.205             | 0.137                           | -0.068        | C6                            | 0.265            | 0.126                          | -0.139        |
| C7                            | -0.236            | -0.102                          | 0.134         | C7                            | -0.242           | -0.169                         | 0.073         |
| C8                            | 0.206             | 0.134                           | -0.072        | C8                            | 0.196            | 0.091                          | -0.105        |
| C9                            | -0.179            | -0.082                          | 0.097         | C9                            | -0.160           | -0.060                         | 0.100         |
| C10                           | 0.120             | 0.071                           | -0.049        | C10                           | 0.130            | 0.074                          | -0.055        |
| C11                           | -0.193            | -0.108                          | 0.086         | C11                           | -0.256           | -0.173                         | 0.083         |
| C12                           | 0.289             | 0.041                           | -0.248        | C12                           | 0.334            | 0.204                          | -0.130        |
| N13                           | 0.045             | 0.035                           | -0.010        | N13                           | 0.055            | 0.049                          | -0.006        |
| C14                           | 0.021             | -0.047                          | -0.068        | C14                           | 0.103            | 0.114                          | 0.011         |
| C15                           | 0.113             | 0.012                           | -0.101        | C15                           | -0.017           | -0.116                         | -0.098        |
| C16                           | -0.122            | 0.055                           | 0.178         | C16                           | 0.030            | 0.140                          | 0.110         |
| C17                           | 0.137             | -0.074                          | -0.210        | C17                           | -0.172           | -0.284                         | -0.112        |
| C18                           | -0.241            | -0.057                          | 0.184         | C18                           | 0.178            | 0.250                          | 0.072         |
| C19                           | 0.080             | -0.002                          | -0.082        | C19                           | -0.142           | -0.215                         | -0.072        |
| <b>TPA: Sum<br/>(C1-C19)</b>  | <b>0.043</b>      | <b>-0.174</b>                   | <b>-0.217</b> | <b>TPA: Sum<br/>(C1-C19)</b>  | <b>0.042</b>     | <b>-0.128</b>                  | <b>-0.170</b> |
| C20                           | -0.082            | -0.163                          | -0.080        | C20                           | 0.065            | 0.015                          | -0.050        |
| C21                           | 0.010             | -0.018                          | -0.028        | C21                           | -0.112           | -0.169                         | -0.057        |
| C22                           | 0.025             | -0.056                          | -0.081        | C22                           | 0.049            | -0.061                         | -0.109        |
| C23                           | 0.044             | 0.001                           | -0.043        | C23                           | 0.040            | 0.007                          | -0.033        |
| C24                           | 0.021             | 0.006                           | -0.015        | C24                           | 0.031            | -0.020                         | -0.050        |
| C25                           | -0.021            | -0.102                          | -0.082        | C25                           | -0.019           | -0.079                         | -0.060        |
| C26                           | 0.085             | 0.055                           | -0.031        | C26                           | 0.077            | 0.046                          | -0.031        |
| C27                           | -0.134            | -0.158                          | -0.023        | C27                           | -0.139           | -0.157                         | -0.019        |
| P28                           | 0.554             | 0.510                           | -0.044        | P28                           | 0.549            | 0.510                          | -0.039        |
| O29                           | -0.512            | -0.557                          | -0.045        | O29                           | -0.512           | -0.556                         | -0.044        |
| O30                           | -0.287            | -0.298                          | -0.011        | O30                           | -0.287           | -0.296                         | -0.009        |
| C31                           | 0.182             | 0.150                           | -0.032        | C31                           | 0.182            | 0.149                          | -0.032        |
| C32                           | 0.049             | 0.026                           | -0.023        | C32                           | 0.050            | 0.027                          | -0.022        |
| <b>PIO: Sum<br/>(C20-C32)</b> | <b>-0.066</b>     | <b>-0.604</b>                   | <b>-0.538</b> | <b>PIO: Sum<br/>(C20-C32)</b> | <b>-0.028</b>    | <b>-0.543</b>                  | <b>-0.515</b> |
| C33                           | -0.007            | -0.269                          | -0.261        | C33                           | 0.123            | 0.004                          | -0.119        |
| C34                           | 0.034             | 0.336                           | 0.302         | C34                           | -0.097           | -0.039                         | 0.058         |
| C35                           | 0.151             | -0.034                          | -0.184        | C35                           | 0.176            | 0.086                          | -0.091        |



|                              |              |               |               |                              |               |               |               |
|------------------------------|--------------|---------------|---------------|------------------------------|---------------|---------------|---------------|
| N36                          | -0.363       | -0.424        | -0.060        | N36                          | -0.357        | -0.420        | -0.062        |
| C37                          | 0.133        | 0.082         | -0.050        | C37                          | 0.134         | 0.080         | -0.054        |
| C38                          | 0.075        | 0.085         | 0.010         | C38                          | 0.007         | 0.002         | -0.005        |
| <b>Py: Sum<br/>(C33-C38)</b> | <b>0.023</b> | <b>-0.222</b> | <b>-0.245</b> | <b>Py: Sum<br/>(C33-C38)</b> | <b>-0.014</b> | <b>-0.287</b> | <b>-0.273</b> |

<sup>a</sup>  $\Delta = (\alpha\text{-TPA-PIO}^* - \alpha\text{-TPA-PIO})$  or  $(\beta\text{-TPA-PIO}^* - \beta\text{-TPA-PIO})$

**Table S7.** Band density measured by ImageJ software.

| Time (h)          | 0 <sup>a</sup> | 0.5 <sup>b</sup> | 1 <sup>c</sup> | 2 <sup>c</sup> | 3 <sup>c</sup> | 6 <sup>c</sup> |
|-------------------|----------------|------------------|----------------|----------------|----------------|----------------|
| GRP78             | 6              | 7                | 19             | 17             | 19             | 21             |
| CHOP              | 10             | 10               | 31             | 32             | 35             | 32             |
| BCI-2             | 25             | 20               | 4              | 3              | 5              | 7              |
| Cleaved caspase-3 | 8              | 9                | 26             | 28             | 28             | 26             |
| LC3B-I            | 20             | 9                | 5              | 6              | 5              | 6              |
| LC3B-II           | 7              | 8                | 35             | 37             | 40             | 36             |
| LC3B-II/ LC3B-I   | 0.35           | 0.89             | 7.00           | 6.17           | 8.00           | 6.00           |
| GAPDH             | 31             | 32               | 31             | 31             | 31             | 31             |

<sup>a</sup> With treatment; <sup>b</sup> After treatment with  $\beta$ -TPA-PIO in dark for 30 min; <sup>c</sup> After treatment with  $\beta$ -TPA-PIO in dark for 30 min and subsequent irradiation with white light of 20 mW cm<sup>-2</sup> for 30 min, then being cultured in dark.

#### 4. Reference

1. J. Tydlitáta, S. Achelle, J. Rodríguez-López, O. Pytela, T. Mikýsek, N. Cabon, F. R. Guen, D. Miklík, Z. Růžičková and F. Bureš, *Dyes Pigm.*, 2017, **146**, 467–478.
2. F. Maurer and C. Carey, Real-Time Measurement of Intracellular O<sub>2</sub> in Mammalian Cells. BMG LABTECH: AN290. See <https://www.bmglabtech.com>.
3. M. J. Frisch, G. W. Trucks, H. B. Schlegel, G. E. Scuseria, M. A. Robb, J. R. Cheeseman, G. Scalmani, V. Barone, B. Mennucci, G. A. Petersson, H. Nakatsuji, M. Caricato, X. Li, H. P. Hratchian, A. F. Izmaylov, J. Bloino, G. Zheng, J. L. Sonnenberg, M. Hada, M. Ehara, K. Toyota, R. Fukuda, J. Hasegawa, M. Ishida, T. Nakajima, Y. Honda, O. Kitao, H. Nakai, T. Vreven, J. A. Montgomery, Jr., J. E. Peralta, F. Ogliaro, M. Bearpark, J. J. Heyd, E. Brothers, K. N. Kudin, V. N. Staroverov, T. Keith, R. Kobayashi, J. Normand, K. Raghavachari, A. Rendell, J. C. Burant, S. S. Iyengar, J. Tomasi, M. Cossi, N. Rega, J. M. Millam, M. Klene, J. E. Knox, J. B. Cross, V. Bakken, C. Adamo, J. Jaramillo, R. Gomperts, R. E. Stratmann, O. Yazyev, A. J. Austin, R. Cammi, C. Pomelli, J. W. Ochterski, R. L. Martin, K. Morokuma, V. G. Zakrzewski, G. A. Voth,

- P. Salvador, J. J. Dannenberg, S. Dapprich, A. D. Daniels, O. Farkas, J. B. Foresman, J. V. Ortiz, J. Cioslowski and D. J. Fox, Gaussian, Inc., Wallingford CT, 2013.
4. K. Aidas, C. Angeli, K. L. Bak, V. Bakken, R. Bast, L. Boman, O. Christiansen, R. Cimiraglia, S. Coriani, P. Dahle, E. K. Dalskov, U. Ekström, T. Enevoldsen, J. J. Eriksen, P. Ettenhuber, B. Fernández, L. Ferrighi, H. Fliegl, L. Frediani, K. Hald, A. Halkier, C. Hättig, H. Heiberg, T. Helgaker, A. C. Hennum, H. Hettema, E. Hjertenæs, S. Høst, I.-M. Høyvik, M. F. Iozzi, B. Jansik, H. J. Aa. Jensen, D. Jonsson, P. Jørgensen, J. Kauczor, S. Kirpekar, T. Kjærgaard, W. Klopper, S. Knecht, R. Kobayashi, H. Koch, J. Kongsted, A. Krapp, K. Kristensen, A. Ligabue, O. B. Lutnæs, J. I. Melo, K. V. Mikkelsen, R. H. Myhre, C. Neiss, C. B. Nielsen, P. Norman, J. Olsen, J. M. H. Olsen, A. Osted, M. J. Packer, F. Pawlowski, T. B. Pedersen, P. F. Provasi, S. Reine, Z. Rinkevicius, T. A. Ruden, K. Ruud, V. Rybkin, P. Salek, C. C. M. Samson, A. Sánchez de Merás, T. Saue, S. P. A. Sauer, B. Schimmelpfennig, K. Sneskov, A. H. Steindal, K. O. Sylvester-Hvid, P. R. Taylor, A. M. Teale, E. I. Tellgren, D. P. Tew, A. J. Thorvaldsen, L. Thøgersen, O. Vahtras, M. A. Watson, D. J. D. Wilson, M. Ziolkowski and H. Ågren, *WIREs Comput. Mol. Sci.*, 2014, **4**, 269–284.
5. K. Liu, S. Zhou, J.-Y. Kim, K. Tillison, D. Majors, D. Rearick, J. H. Lee, R. F. Fernandez-Boyanapalli, K. Barricklow, M. S. Houston and C. M. Smas, *Am. J. Physiol-Endoc. M.*, 2009, **297**, E1395–E1413.
